1 ***Mapping sleep's phenotypic and genetic links to the brain and heart: a systematic***  
2 ***analysis of multimodal brain and cardiac images in the UK Biobank***

3

4 **Running title: Imaging genetics for sleep**

5

6 Zirui Fan<sup>1,2</sup>, Yujue Li<sup>2</sup>, Juan Shu<sup>2</sup>, Xiaochen Yang<sup>2</sup>, Bingxuan Li<sup>3</sup>, Jinjie Lin<sup>4</sup>, Qianwen Wang<sup>5</sup>,  
7 Peristera Paschou<sup>6</sup>, Tengfei Li<sup>7,8</sup>, Hongtu Zhu<sup>9,10,11,12\*</sup>, and Bingxin Zhao<sup>1,2\*</sup>

8

9 <sup>1</sup>Department of Statistics and Data Science, University of Pennsylvania, Philadelphia, PA 19104, USA.

10 <sup>2</sup>Department of Statistics, Purdue University, West Lafayette, IN 47907, USA.

11 <sup>3</sup>Department of Computer Science, Purdue University, West Lafayette, IN 47907, USA.

12 <sup>4</sup>Yale School of Management, Yale University, New Haven, CT 06511, USA.

13 <sup>5</sup>Peking University Sixth Hospital, Peking University Institute of Mental Health, NHC Key Laboratory of  
14 Mental Health (Peking University), National Clinical Research Center for Mental Disorders (Peking University  
15 Sixth Hospital), Beijing 100191, China.

16 <sup>6</sup>Department of Biological Sciences, Purdue University, West Lafayette, IN 47907, USA.

17 <sup>7</sup>Department of Radiology, University of North Carolina at Chapel Hill, Chapel Hill, NC 27599, USA.

18 <sup>8</sup>Biomedical Research Imaging Center, School of Medicine, University of North Carolina at Chapel Hill,  
19 Chapel Hill, NC 27599, USA.

20 <sup>9</sup>Department of Biostatistics, University of North Carolina at Chapel Hill, Chapel Hill, NC 27599, USA.

21 <sup>10</sup>Department of Genetics, University of North Carolina at Chapel Hill, Chapel Hill, NC 27599, USA.

22 <sup>11</sup>Department of Computer Science, University of North Carolina at Chapel Hill, Chapel Hill, NC 27599, USA.

23 <sup>12</sup>Department of Statistics and Operations Research, University of North Carolina at Chapel Hill, Chapel Hill,  
24 NC 27599, USA.

25 ***\*Corresponding authors:***

26 Hongtu Zhu

27 3105C McGavran-Greenberg Hall, 135 Dauer Drive, Chapel Hill, NC 27599.

28 E-mail address: [htzhu@email.unc.edu](mailto:htzhu@email.unc.edu) Phone: (919) 966-7250

29

30 Bingxin Zhao

31 413 Academic Research Building, 265 South 37th Street, Philadelphia, PA 19104.

32 E-mail address: [bxzhao@upenn.edu](mailto:bxzhao@upenn.edu) Phone: (215) 898-8222

1 **Abstract**

2 Sleep is essential for the health of the brain and heart. Although sleep has been identified  
3 as a factor in a few specific clinical outcomes, a systematic analysis of the relationship  
4 between sleep and brain/heart and their genetic underpinnings is lacking. Medical images  
5 can provide useful clinical endophenotypes for organ structures and functions. Here we  
6 present a systematic genetic investigation of sleep-brain/heart connections using multi-  
7 modal brain and cardiac images from over 40,000 subjects in the UK Biobank. We  
8 identified novel phenotypic and genetic links between sleep and a wide range of imaging  
9 traits, such as brain structures, white matter integrity, brain activities, as well as cardiac  
10 structures and functions. We prioritized a number of imaging modalities and traits for  
11 specific sleep conditions, such as the resting brain function measures in the somatomotor  
12 network with narcolepsy. Sleep and imaging had overlapping genetic influences in 39  
13 genomic loci, some of which showed evidence of shared causal genetic variants. In  
14 conclusion, large-scale imaging genetic data illuminate the implications of sleep on brain  
15 and cardiac health and their genetic links. An interactive web browser ([www.ig4sleep.org](http://www.ig4sleep.org))  
16 has been developed to facilitate exploring our results.

17  
18 **Keywords:** Brain Imaging; Brain Health; Cardiac Imaging; Heart Health; Sleep; UK Biobank.  
19  
20  
21  
22  
23  
24  
25  
26  
27  
28  
29  
30  
31

1 A growing body of evidence suggests that poor sleep is a risk factor for physical, cognitive,  
2 and mental health problems<sup>1</sup>. Sleep traits (such as sleep quality and duration) and  
3 disorders (such as insomnia and narcolepsy) are associated with various cardiovascular  
4 diseases and brain disorders. For example, rapid eye movement sleep behavior disorder  
5 was found to be a strong predictor for the development of neurodegenerative diseases  
6 such as dementia and Parkinson's disease<sup>2,3</sup>. Sleep dysregulation and short sleep duration  
7 in midlife were consistently linked to higher risk of Alzheimer's disease and other  
8 dementias<sup>4</sup>. In addition, both insufficient and excess sleep duration may cause a higher  
9 incidence of cardiovascular outcomes, including coronary heart disease<sup>5-7</sup>, hypertension<sup>8</sup>,  
10 atrial fibrillation<sup>9,10</sup>, and stroke<sup>11,12</sup>. Individuals with sleep disturbance were also more  
11 likely to have mental and psychiatric disorders<sup>13</sup>, such as anxiety<sup>14</sup>, post-traumatic stress  
12 disorder<sup>15</sup>, schizophrenia<sup>16</sup>, bipolar disorder, major depressive disorder (MDD), and  
13 attention-deficit/hyperactivity disorder (ADHD)<sup>17,18</sup>.

14

15 Magnetic resonance imaging (MRI) provides noninvasive and comprehensive measures  
16 of the structure and function of the human organs, including the brain and heart. Imaging  
17 traits generated from brain and cardiac MRI are well-established clinical endophenotypes  
18 and have been widely used in early prediction and detection of cardiovascular,  
19 neurological, and neuropsychiatric outcomes<sup>19-22</sup>. Using MRI data, several studies have  
20 examined the sleep-related structural and functional alterations in the brain and heart<sup>23-</sup>  
21 <sup>30</sup>. Two major limitations of most existing studies have been i) the limited study sample  
22 size, which was usually less than a few hundred; and ii) focusing on one single MRI  
23 modality (or trait) and/or one sleep trait, such as hippocampal atrophy<sup>25</sup> and sleep  
24 duration<sup>30-32</sup>. It is known, however, that large sample sizes are needed for MRI studies to  
25 detect small effect sizes<sup>33</sup> and produce reproducible findings, especially for brain  
26 functional MRI (fMRI) data<sup>34</sup>. In addition, distinct MRI modalities and sleep conditions  
27 may be relevant to different diseases and health-related complex characteristics<sup>21</sup>.  
28 Therefore, a systematic analysis of multi-modal MRI data and multiple sleep conditions in  
29 a large cohort would provide a more comprehensive understanding of sleep-related  
30 changes in brain and heart structures and functions.

31

1 Genome-wide association studies (GWAS) have shown that sleep disorders and traits are  
2 heritable and have a polygenic genetic architecture<sup>35-45</sup>. The sleep-associated genetic  
3 variants are enriched for genes expressed in the brain and for metabolic and psychiatric  
4 pathways<sup>44</sup>. Genetic correlations between sleep traits and brain-related disorders (such  
5 as depression and schizophrenia) have been discovered, suggesting their shared  
6 neurogenetic basis<sup>46</sup>. On the other hand, both brain and cardiac MRI traits are also  
7 heritable and hundreds of associated genetic loci have been identified in recent GWAS<sup>47-</sup>  
8 <sup>58</sup>. However, few studies have ever integrated the multi-organ MRI measures and sleep  
9 conditions to explore the genetic interactions among sleep behavior, brain and cardiac  
10 structure/function, and related clinical endpoints.

11  
12 To overcome these challenges, here we examined the phenotypic and genetic sleep-  
13 brain/heart connections using multi-modal cardiac and brain MRI data from more than  
14 40,000 subjects in the UK Biobank (UKB) study<sup>59</sup>. We included three major brain MRI  
15 modalities: 1) brain anatomical and neuropathological structures from structural MRI,  
16 including regional brain volumes<sup>54</sup> and cortical thickness traits<sup>60</sup>; 2) white matter  
17 microstructures from diffusion MRI, including multiple diffusion tensor imaging (DTI)  
18 parameters<sup>56</sup>; and 3) intrinsic and extrinsic functional organizations of the cerebral cortex  
19 from resting and task fMRI, including functional connectivity and amplitude traits<sup>58</sup>. For  
20 heart, we used 82 traits extracted from short-axis, long-axis, and aortic cine cardiac MRI<sup>61</sup>,  
21 including global and regional measures of 4 cardiac chambers (the left ventricle, right  
22 ventricle, left atrium, and right atrium), as well as 2 aortic sections (the ascending aorta  
23 and descending aorta). We mainly examined 7 self-reported sleep-related conditions in  
24 the UKB study: sleep duration, getting up in the morning, chronotype (morning/evening  
25 person), daytime nap, insomnia (sleeplessness), snoring, and narcolepsy (daytime  
26 sleepiness/dozing). Detailed information on these imaging and sleep data can be found  
27 in the Methods section. A series of phenotypic, genetic, and predictive analyses were  
28 conducted to understand the health implications of sleep. The overview of our study is  
29 presented in **Figure 1** and our results can be explored via the interactive web browser at  
30 [www.ig4sleep.org](http://www.ig4sleep.org).

31

## 32 **RESULTS**

## 1 **An atlas of sleep associations with multi-modal brain and cardiac MRI traits**

2 We examined the phenotypic associations between 7 sleep conditions and a wide range  
3 of brain and cardiac MRI traits, including 101 regional brain volumes<sup>54</sup>, 63 cortical  
4 thickness measures<sup>60</sup>, 110 DTI parameters<sup>56</sup>, 92 parcellation-based network-level traits in  
5 resting and task fMRI<sup>58</sup>, respectively, as well as 82 heart imaging traits<sup>60,61</sup> (**Table S1**). We  
6 performed regression analysis with unrelated white British subjects (average  $n = 29,025$ ,  
7 Methods). Among the 3,780 (7×540) association pairs, 395 associations were significant  
8 at the false discovery rate (FDR) level of 5% (by the Benjamini-Hochberg procedure) and  
9 92 of them further passed the more stringent Bonferroni significance level ( $P < 1.32 \times 10^{-5}$ ,  
10  $0.05/3780$ ) (**Figs. 2A, S1**, and **Table S2**). Significant associations were observed for all the  
11 7 sleep conditions and 6 groups of imaging traits. Below we highlight the associations  
12 survived the Bonferroni multiple testing adjustment.

13

14 Resting fMRI showed the strongest sleep associations among all 6 groups of imaging traits,  
15 which were mostly related to sleep duration, narcolepsy, and getting up. Specifically,  
16 sleep duration had widespread negative associations with resting fMRI traits (including  
17 both functional connectivity and amplitude<sup>62</sup> measures) in multiple functional networks  
18 ( $\beta$  range =  $[-0.062, -0.036]$ ,  $P < 1.02 \times 10^{-5}$ ), with the strongest association in the  
19 somatomotor network ( $\beta = -0.062$ ,  $P = 3.11 \times 10^{-13}$ ). Somatomotor function was important  
20 in multiple sleep stages and poor sleep quality and shorter duration have been linked to  
21 increased somatomotor functional connectivity in young samples<sup>63-65</sup>. In addition, resting  
22 fMRI traits positively correlated with easy getting up ( $\beta$  range =  $[0.036, 0.048]$ ,  $P <$   
23  $1.28 \times 10^{-5}$ ) and were mostly positively associated with narcolepsy ( $\beta$  range =  $[-0.051,$   
24  $0.064]$ ,  $P < 1.27 \times 10^{-5}$ ). Narcolepsy patients have been found to have alerted functional  
25 organizations, although previous sample sizes were usually small, making conclusions  
26 inconclusive<sup>66,67</sup>. In our analysis, decreased functional connectivity was mainly found in  
27 the default mode network, as well as between the auditory and orbito-affective as well  
28 as ventral-multimodal networks<sup>68</sup>. Functional connectivity in most of other networks had  
29 positive associations with narcolepsy (**Fig. S2**). Compared to resting fMRI, task fMRI had  
30 much weaker signals, with only two associations with getting up remaining after  
31 Bonferroni correction ( $\beta$  range =  $[-0.039, 0.042]$ ,  $P < 1.07 \times 10^{-5}$ ).

32

1 To uncover detailed spatial association patterns and pinpoint sleep-related brain regions,  
2 we further performed area-level resting fMRI analysis with 64,620 ( $360 \times 359/2$ )  
3 functional connectivity measures among 360 brain functional areas in 12 networks<sup>68,69</sup>.  
4 These high-resolution fMRI traits provided fine-grained information on the functional  
5 organization of the cerebral cortex. At the Bonferroni significance level ( $P < 7.74 \times 10^{-7}$ ,  
6  $0.05/64,620$ ), sleep duration had negative associations with most functional areas in the  
7 somatomotor and auditory networks, as well as some areas of the visual (visual1 and  
8 visual2), cingulo-opercular, and language networks (**Fig. 2B**). In contrast, most of the  
9 positive associations with sleep duration were related to the areas of the default mode  
10 network. Furthermore, we partitioned the default mode network into seven clusters<sup>58</sup>,  
11 showing that sleep duration was predominantly related to the hippocampal and visual  
12 subclusters (**Fig. S3A**). As compared to long sleep duration, self-reported shorter sleep  
13 duration was associated with lower functional connectivity in the default mode  
14 network<sup>70-72</sup>. The default mode network is an active network that integrates information<sup>73</sup>  
15 and plays an important role in the awake brain<sup>74</sup>. In addition to previous evidence that  
16 shorter sleep duration was related directly to higher levels of Amyloid- $\beta$ <sup>75</sup>, our findings  
17 provided further evidence that reducing sleep duration had a significant impact on brain  
18 functioning. For narcolepsy, positive associations were mainly in the somatomotor  
19 network and the connections between the somatomotor and visual networks (**Fig. 2C**). In  
20 contrast, negative associations with narcolepsy were found in the default mode network,  
21 most of which were related to the visual subcluster (**Fig. S3B**). For getting up and daytime  
22 nap, most of their associations were related to the visual and somatomotor networks  
23 (**Figs. S4A-S4B**). Overall, these results showed that functional connectivity of the  
24 somatomotor and visual networks had substantial connections with sleep conditions. In  
25 the default model network, narcolepsy and sleep duration were associated with brain  
26 functional activity differently than in other networks.

27

28 Our area-level analysis also identified related functional areas for snoring, insomnia, and  
29 chronotype. Particularly, snoring was linked to resting functional connections in the  
30 frontoparietal network, especially the left and right 13l areas in the posterior orbital gyrus  
31 (**Fig. S4C**). The functional connectivity between the left/right 13L areas and frontoparietal,  
32 visual, cingulo-opercular, and dorsal attention networks was increased in snoring, while

1 the functional connectivity with the default mode network decreased. Reduced  
2 functional connectivity was also observed within the default mode network (**Fig. S3C**).  
3 Associations with chronotype were mainly detected among cognitive networks, especially  
4 between the cingulo-opercular and default mode networks (**Figs. S3D and S4D**). In  
5 addition, insomnia was found to be negatively associated with resting functional  
6 connections within the somatomotor network (**Fig. S4E**). In summary, sleep-related brain  
7 functional variations were uncovered in specific brain areas, prioritizing related fMRI  
8 biomarkers for future sleep research.

9

10 Next, we observed significant associations between DTI parameters and multiple sleep  
11 conditions, especially chronotype (**Figs. 2A and S5**). Being an evening person was  
12 associated with higher mean diffusivity (MD) and axial diffusivity (AD) in multiple brain  
13 white matter tracts, such as the anterior corona radiata, body of corpus callosum,  
14 retrolenticular part of internal capsule, anterior limb of internal capsule, and superior  
15 corona radiata ( $\beta$  range = [0.042, 0.048],  $P < 1.23 \times 10^{-5}$ ). Increased MD and AD may  
16 indicate abnormalities and healthy aging in glial tissue, in which the glial cells were  
17 involved in the regulation of circadian rhythms<sup>76</sup>. It has been reported that evening  
18 chronotype exhibited increased level of white matter changes<sup>77</sup>. In addition, we observed  
19 significant associations between snoring and the radial diffusivity (RD) in the corticospinal  
20 tract ( $\beta = 0.040$ ,  $P = 1.32 \times 10^{-6}$ ), and between daytime nap and the AD of the body of  
21 corpus callosum tract ( $\beta = 0.042$ ,  $P = 1.14 \times 10^{-5}$ ). Compared to resting fMRI and DTI  
22 parameters, structural MRI traits (regional brain volumes and cortical thickness) had less  
23 phenotypic associations with sleep. Associations survived at the Bonferroni significance  
24 level were all related to daytime nap, which was associated with reduced right cerebellum  
25 white matter volume ( $\beta = -0.048$ ,  $P = 1.30 \times 10^{-5}$ ) and smaller cortical thickness of the left  
26 pars triangularis and right insula ( $\beta$  range = [-0.041, -0.039],  $P < 4.29 \times 10^{-5}$ ).

27

28 Sleep also correlated significantly with cardiac MRI traits of the left ventricle, right  
29 ventricle, and right atrium (**Figs. 2A and S6**). Specifically, snoring was positively linked to  
30 both left and right heart structures, including the left/right ventricular end-diastolic  
31 volume (LVEDV and RVEDV), right atrium maximum and stroke volumes, and right  
32 ventricular end-systolic volume (RVESV) ( $\beta$  range = [-0.047, 0.064],  $P < 1.20 \times 10^{-5}$ ). Snoring

1 may affect the cardiac function and increase the risk of cardiovascular disease especially  
2 in women<sup>24,78</sup>. In addition, getting up had widespread associations with the LVEDV, left  
3 ventricular end-systolic volume (LVESV), left ventricular myocardial mass (LVM), RVEDV,  
4 RVESV, and right ventricular stroke volume (RVSV) ( $\beta$  range = [0.045, 0.072],  $P < 1.70 \times 10^{-6}$ ).  
5 Furthermore, negative associations with RVEDV were found for daytime nap and  
6 chronotype ( $\beta$  range = [-0.0613, -0.0610],  $P < 1.30 \times 10^{-7}$ ). Human health is closely related  
7 to sleep chronotypes<sup>45</sup>, which are behavioral manifestations of circadian rhythms<sup>79</sup>. In  
8 perspective studies, early chronotype is often regarded as a sign of healthy sleep  
9 behavior<sup>80,81</sup>. Individuals with an early chronotype are typically at a reduced risk of  
10 developing cardiovascular diseases<sup>82</sup> and heart failure<sup>81</sup>. Circadian and cardiovascular  
11 diseases, however, remain elusive in terms of their underlying mechanisms. The present  
12 study established a clear physiologic relationship between early chronotype and cardiac  
13 health. Overall, we mapped phenotypic links between the brain and cardiac MRI traits  
14 and sleep characteristics. These imaging endophenotypes may aid in future clinical  
15 research and applications to better understand sleep's role in brain and heart-related  
16 clinical outcomes.

17

18 In the phenotypic analysis above, UKB subjects who had both imaging and sleep data were  
19 considered, whereas more than 80% UKB subjects had only sleep data and thus were  
20 excluded. In order to include these non-imaging UKB subjects in our study, we developed  
21 polygenic risk scores (PRS) by using GWAS summary statistics of imaging traits from  
22 previous studies<sup>54,56,58,60</sup>. These genetically predicted imaging traits allowed us to repeat  
23 the above sleep-imaging association analysis in non-imaging UKB unrelated white British  
24 subjects (average  $n = 217,254$ , removing relatives of imaging subjects, Methods). In this  
25 PRS analysis, 276 significant associations were identified at the FDR 5% level, covering all  
26 the 7 sleep conditions and 6 groups of imaging PRS. Among these 276 associations, 35  
27 further passed the stringent Bonferroni significance level ( $P < 1.32 \times 10^{-5}$ ) (**Table S3** and  
28 **Figs. S7-S8**). The results of phenotypic and PRS analyses were largely consistent, indicating  
29 that the sleep-imaging associations discovered by a small proportion of UKB imaging  
30 subjects had good generalizability in the whole UKB cohort. For example, similar to the  
31 phenotypic analysis, resting fMRI traits also had the largest proportion of significant  
32 associations (97/276 at FDR 5% level and 25/35 at the Bonferroni level) in PRS analysis.



1 Furthermore, considering that imaging PRS were predicted with genetic information,  
2 genetic factors may play an important role in influencing sleep-imaging associations. In  
3 the following sections, we will examine these underlying genetic influences in more detail.

4

#### 5 **Characterizing sleep-imaging genetic overlaps in 39 genomic loci.**

6 To understand the genetic co-architecture underlying sleep-imaging associations, we  
7 characterized the genetic pleiotropy between sleep conditions and multi-modal brain and  
8 cardiac MRI traits at their jointly significant GWAS loci. Briefly, we searched for sleep-  
9 significant genetic variants reported in the NHGRI-EBI GWAS catalog<sup>83</sup> (version 2022-07-  
10 09). Then we identified those variants (and variants in linkage disequilibrium [LD] with  
11 them,  $r^2 \geq 0.6$ ) that were also significant in GWAS of brain and cardiac MRI traits  
12 (Methods). We found that a total of 39 genomic loci showed shared genetic influences on  
13 both sleep and imaging traits, covering regional brain volumes<sup>54</sup>, DTI parameters<sup>56</sup>, whole  
14 brain independent component analysis (ICA)-based resting fMRI traits<sup>53,55,84</sup>, parcellation-  
15 based resting and task fMRI traits<sup>58</sup>, and cardiac MRI traits<sup>60</sup> (**Table S4**). We tagged  
16 previous GWAS for a wide range of sleep conditions, including insomnia<sup>39</sup>, chronotype<sup>85,86</sup>,  
17 daytime nap<sup>39</sup>, depressive symptom (sleep problems)<sup>87</sup>, getting up<sup>39</sup>, hypersomnia<sup>88</sup>,  
18 sleep duration<sup>37,89</sup>, and snoring<sup>90</sup> (**Fig. 3** and **Table S5**). Additionally, we estimated the  
19 probability that sleep-imaging trait pairs shared causal genetic variants using the Bayesian  
20 colocalization test<sup>91</sup>. We considered pairs with a probability of shared causal variant  
21 (PPH4) greater than 0.8 to be colocalized<sup>91,92</sup>. Below we summarized the results for each  
22 imaging modality group.

23

24 There were 14 genomic loci where sleep-significant variants were associated with DTI  
25 parameters (LD  $r^2 \geq 0.6$ ). For example, shared genetic components between DTI  
26 parameters and chronotype<sup>93</sup> were found in 7 loci, including 1q25.2 (sleep index variant  
27 rs975025, tagged many DTI parameters, such as AD of the splenium of corpus callosum),  
28 19p13.11 (rs9636202, mode of anisotropy (MO) of the external capsule), 3p12.3  
29 (rs7429614, MO of the corticospinal tract), 6p22.2 (rs766406, MD of the inferior fronto-  
30 occipital fasciculus), 17q21.31 (rs72828815, MD of the anterior corona radiata), 11p15.5  
31 (rs9795439, MO of the cingulum), 8p23.1 (rs2979256, FA of the inferior fronto-occipital  
32 fasciculus) (**Figs. 4A-4B** and **S9-S12**). The 1q25.2, 19p13.11, and 11p15.5 regions had

1 strong evidence of shared causal genetic variants between chronotype and DTI  
2 parameters (PPH4 > 0.976). Multiple sleep index variants were expression quantitative  
3 trait loci (eQTLs) in brain tissues, such as rs975025 (for *FAM163A* and *FAM20B*),  
4 rs72828815 (for *DBF4B* and *MEIOC*), and rs9795439 (*KRTAP5-4*)<sup>94</sup>. For sleep duration<sup>37</sup>,  
5 we found shared genetic influences in three loci, including 10p12.31 (rs12246842, MD of  
6 the fornix), 6p22.1 (rs34556183, MD of the superior corona radiata), and 17q21.31  
7 (rs1991556, MD of the anterior corona radiata) (**Figs. S13-15**). Colocalization was  
8 detected in 10p12.31 (PPH4 = 0.836), and the sleep index variants rs34556183 and  
9 rs1991556 were brain eQTLs of multiple genes such as *ZSCAN31* and *ARL17A*.

10

11 In addition, DTI-insomnia<sup>42</sup> genetic overlaps were found in 6 loci, including 3p21.31  
12 (rs10865954, FA of the fornix-stria terminalis), 16q12.1 (rs1544637, AD across the whole  
13 brain), 15q26.1 (rs176647, FA of the posterior limb of internal capsule), 17q21.31  
14 (rs2239923, MD of the anterior corona radiata), 9q22.31 (rs10156602, FA of the body of  
15 corpus callosum), and 10p12.31 (rs12246842, MD of the fornix) (**Figs. S16-S19**). The sleep-  
16 significant variant rs10865954 was a brain eQTL for multiple genes such as *NCKIPSD*,  
17 *WDR6*, and *GMPPB*. We also tagged daytime nap, snoring, and getting up in 17q21.31  
18 (rs57222984, mean AD of the superior fronto-occipital fasciculus). Hypersomnia had  
19 genetic overlaps with MO of the cingulum (hippocampus) in 2p16.1 (rs359268) (**Figs. S20**).  
20 Among these sleep-DTI regions, we also found shared genetic influences with well-being  
21 spectrum, neuroticism, depression, risk-taking tolerance, autism spectrum disorder,  
22 cognitive traits (e.g, intelligence, math ability, reaction time, and education), life  
23 satisfaction, smoking, hypertension, and coronary artery disease, which might be a cause  
24 or consequence of white matter changes in the brain. Overall, these results suggested  
25 that sleep conditions were genetically associated with white matter integrity across  
26 multiple genomic regions, where they also overlapped with neuropsychiatric disorders,  
27 cognitive traits, and cardiovascular risk factors.

28

29 For resting fMRI, we found the shared genetic influences with sleep in 9 genomic regions.  
30 Insomnia genetic loci were in LD ( $r^2 \geq 0.6$ ) with resting fMRI traits in 4 regions, including  
31 2q14.1 (rs62158170, such as the somatomotor network), 2p16.1 (rs12713372, the  
32 frontoparietal and posterior-multimodal networks), 4q24 (rs11097861, the default mode,

1 central executive, and salience networks), as well as 19q13.32 (rs429358, the default  
2 mode network) (**Figs. 4C** and **S21-S23**). ICA-based<sup>84</sup> and parcellation-based<sup>58</sup> resting fMRI  
3 traits showed similar overlaps. Strong colocalizations between insomnia and resting fMRI  
4 were identified in 2q14.1, 4q24, and 19q13.32 (PPH4 > 0.951). The sleep index variant  
5 rs62158170 (2q14.1) was a brain eQTL of *PAX8*. As one of the two variants in the *APOE*  $\epsilon$ 4  
6 locus, rs429358 (19q13.32) contributed to Alzheimer's disease risk. In rs429358, insomnia  
7 also had shared genetic influences with task fMRI traits of the visual network (**Fig. S24**).  
8 Snoring was genetically linked to resting fMRI traits in 12q14.3 (rs10878269, PPH4 =  
9 0.976), 3p11.1 (rs145367119), and 17q21.31 (rs57222984), all of which tagged the triple  
10 networks of psychopathology (the default mode, central executive, and salience  
11 networks)<sup>95</sup> (**Fig. S25-S27**).

12

13 In 2q14.1, 2p16.1, and 17q21.31, we observed shared genetic influences with sleep  
14 duration, daytime nap, depressive symptom (sleep problems), and getting up (**Figs. S28-**  
15 **S29**). Chronotype-resting fMRI overlaps were found in 11q24.1 (rs3867239, the central  
16 executive, salience, default mode, and attention networks, PPH4 = 0.975) and 2p16.3  
17 (rs17396357, the central executive, salience, default mode, and attention networks) (**Figs.**  
18 **S30-S31**). The rs17396357 was a brain eQTL of *GTF2A1L*, *FOXN2*, *MSH6*, *STON1-GTF2A1L*,  
19 *STON1*, and *LHCGR*. In these regions, we also found genetic links ( $LD\ r^2 \geq 0.6$ ) with  
20 cognitive traits (e.g, cognitive decline, math ability and education), myocardial infarction,  
21 type 2 diabetes, mental health (e.g., depression, schizophrenia, autism spectrum disorder,  
22 and neuroticism), neurological disorders (e.g., Alzheimer's disease and Parkinson's  
23 disease), and blood pressure.

24

25 Sleep traits and regional brain volumes had shared genetic influences ( $LD\ r^2 \geq 0.6$ ) in 20  
26 genomic regions. Many brain regions were affected by 9 insomnia-related genomic loci  
27 (10q24.32, 12q24.31, 4q24, 2q33.3, 5q14.3, 11q14.1, 12q14.3, 10p12.31, and 18q21.2),  
28 such as the left/right basal forebrain (rs12411886), cerebellar vermal lobules I-V  
29 (rs28576953), left/right accumbens area (rs6855246 and rs13135092), cerebellar vermal  
30 lobules VIII-X (rs55772859), left/right putamen (rs16903122, rs667730, and rs375051009),  
31 total brain volume (rs61921611), and left/right lateral ventricle (rs12251016) (**Figs. S32-**  
32 **S36**). Colocalizations between insomnia and regional brain volumes were identified in

1 10q24.32 and 11q14.1 (PPH4 > 0.853). Insomnia has previously been associated with  
2 shrinking subcortical volumes and smaller cortical surface areas<sup>96,97</sup>. These findings may  
3 suggest the genetic basis of brain structure-insomnia connections. Chronotype also  
4 overlapped genetically with the left/right putamen in 5q14.3 (rs12657776), as well as  
5 other brain regions in 5 more loci, including 16q12.2 (rs4784256, such as brain stem),  
6 9q22.2 (rs3138490, left amygdala), 11p15.5 (rs9795439, white matter), and 3q13.11  
7 (rs34967119, right cuneus), and 2p11.2 (rs11681299, brain stem) (**Figs. S37-S39**). We  
8 observed colocalization between sleep and chronotype in 9p22.2, 11p15.5, and 2p11.2  
9 (PPH4 > 0.856). Furthermore, we found genetic overlaps for daytime nap in 5 additional  
10 genomic loci: 1p31.1, 7p22.2, 17q21.31, 11q12.2, and 5q22.2. Daytime nap was  
11 genetically linked to the cerebellar vermal lobules VIII-X (rs10782582), left/right lateral  
12 ventricle (rs4557589), total brain volume (rs57222984), left/right cerebellum exterior  
13 (rs174541), and left/right cerebellum white matter (rs2099810) (**Figs. S40-S42**). Both  
14 11q12.2 and 5q22.2 had strong evidence of shared causal genetic variants between  
15 daytime nap and regional brain volumes (PPH4 > 0.923). In addition, 17q21.31, 11q12.2,  
16 and 4q24 (rs13109404, left accumbens area) regions contributed to the genetic links  
17 between sleep duration and regional brain volumes. Similarly, 12q14.3, 14q32.2, and  
18 17q21.31 were associated with both snoring and multiple regions, including the right  
19 inferior parietal (rs10878269), left thalamus proper (rs2664299), right fusiform  
20 (rs4792897), and total brain volume (rs57222984) (**Figs. 4D and S43**). We found  
21 colocalization between snoring and regional brain volumes in 12q14.3 and 14q32.2 (PPH4 >  
22 0.956). There were also genetic overlaps with getting up in 3 of the above loci: 17q21.31,  
23 4q24, and 11q12.2.

24

25 Genetic pleiotropy ( $r^2 \geq 0.6$ ) was observed between sleep and cardiac MRI traits in 5  
26 regions. Chronotype-heart overlaps were observed in 8p23.1 (rs11992186, regional peak  
27 circumferential strain), 22q13.1 (rs139911, ascending aorta maximum area), 11p11.2  
28 (rs11605348, global myocardial-wall thickness), and 17q21.32 (rs11992186, RVEDV) (**Figs.**  
29 **S44-S45**). Shared genetic influences were found in 11p11.2 with insomnia (rs10838708,  
30 global myocardial-wall thickness) and in 17q21.31 with sleep duration, snoring, getting  
31 up, as well as daytime nap (rs1991556 and rs57222984, regional myocardial-wall  
32 thickness) (**Figs. S46-S47**). We also found genetic overlaps with mental health (e.g.,

1 neuroticism) and heart diseases (e.g., atrial fibrillation and coronary artery disease) in  
2 these loci. In summary, sleep had substantial genetic links with brain and heart structural  
3 and functional variations. Different sleep conditions, such as insomnia and daytime nap,  
4 may have genetic overlaps with the brain and heart in different genomic regions.  
5 Integrating imaging and sleep GWAS results may provide insight into sleep-related brain  
6 and heart health mechanisms.

7

### 8 **Genome-wide and local genetic correlation patterns**

9 We quantified the genome-wide genetic similarity between sleep conditions and imaging  
10 traits by genetic correlations (GC) estimated from cross-trait LD score regression<sup>98</sup>. We  
11 collected 19 sets of publicly available sleep GWAS summary statistics (**Table S6**) and  
12 screened them with GWAS summary statistics of multi-modal imaging traits (Methods).  
13 At 5% FDR level, significant genetic correlations were observed between sleep and all  
14 imaging modalities (**Fig. 5A** and **Table S7**). We reported below the top-ranking significant  
15 brain and cardiac MRI traits associated with sleep after applying the FDR correction ( $P <$   
16  $6.18 \times 10^{-4}$ ).

17

18 There were many resting fMRI traits associated genetically with sleep conditions in  
19 agreement with our phenotypic association analysis. Particularly, sleep duration and  
20 narcolepsy were genetically associated with the functional connectivity of multiple brain  
21 networks, such as the somatomotor, visual, language, cingulo-opercular, and  
22 frontoparietal (GC range = [-0.472, 0.508],  $P < 6.18 \times 10^{-4}$ ). Other sleep traits were also  
23 genetically correlated with more specific brain networks. For example, snoring was  
24 genetically associated with functional connectivity between the default mode and orbito-  
25 affective networks, as was daytime napping with functional connectivity between the  
26 cingulo-opercular and frontoparietal networks (GC range = [-0.286, 0.250],  $P < 6.00 \times 10^{-4}$ ).  
27 Besides functional connectivity traits, resting amplitude traits<sup>62,99,100</sup> were linked to sleep  
28 duration and narcolepsy, as well as snoring, with more area-level information revealed  
29 (**Fig. S48**). For example, amplitude results consistently demonstrated that narcolepsy was  
30 genetically associated with brain functional activity in the somatomotor and secondary  
31 visual areas (GC range = [0.183, 0.418],  $P < 6.00 \times 10^{-4}$ ). In addition, sleep duration had  
32 negative genetic correlations with brain functional activity in the auditory, cingulo-

1 opercular, dorsal-attention, somatomotor, and visual areas (GC range = [-0.240, -0.149],  
2  $P < 6.00 \times 10^{-4}$ ). Snoring was positively correlated with brain functional areas in the default  
3 mode, frontoparietal, and orbito-affective networks (GC range = [0.137, 0.234],  $P <$   
4  $6.00 \times 10^{-4}$ ). Genetic links between sleep and brain functions were also observed in task  
5 fMRI (GC range = [-0.315, 0.488],  $P < 6.00 \times 10^{-4}$ , **Fig. S49**). Overall, sleep and brain function  
6 were genetically correlated throughout brain functional networks, with specific patterns  
7 confined to certain areas.

8

9 For DTI parameters, significant negative genetic correlations were consistently observed  
10 between snoring and the multiple DTI-derived metrics (AD, MD, and RD) of the  
11 corticospinal tract (GC range = [-0.202, -0.123],  $P < 1.03 \times 10^{-4}$ , **Fig. S50**). The corticospinal  
12 tract is a major neuronal pathway carrying movement-related information from the  
13 cerebral cortex to the spinal cord. Impaired corticospinal tract was observed in poor  
14 cognitive performance and patients with obstructive sleep apnea<sup>101</sup>. A few genetic  
15 correlations were also observed between regional brain volumes and sleep conditions,  
16 especially insomnia (**Fig. S51**). Specifically, insomnia was genetically correlated with  
17 increased brain volume in the left and right caudate (GC range = [0.138, 0.170],  $P <$   
18  $7.02 \times 10^{-5}$ ) as well as decreased total brain volume (GC = -0.132,  $P < 2.15 \times 10^{-5}$ ). The  
19 caudate is a well-known functional region for sleep and modulates multiple sleep  
20 stages<sup>102</sup>. Additionally, we found genetic correlations between left ventricle and  
21 chronotype, as well as between left atrium and snoring (GC range = [-0.192, 0.166],  $P <$   
22  $6.00 \times 10^{-4}$ , **Fig. S52**). The left atrium has been reported to be associated with obstructive  
23 sleep apnea in coronary artery disease<sup>103</sup>.

24

25 In the above genome-wide genetic correlation analyses, sleep-imaging traits are assumed  
26 to be genetically similar throughout the genome. To examine local patterns of shared  
27 genetic basis between sleep and imaging and to localize coheritability in specific genomic  
28 regions, we partitioned the genome into thousands of regions and performed local  
29 genetic correlations analysis using LAVA<sup>104</sup> and SUPERGNOVA<sup>105</sup> pipelines. In both LAVA  
30 and SUPERGNOVA, local genetic correlations were found at the FDR 5% level ( $P < 1.87 \times 10^{-4}$   
31 for LAVA,  $P < 5.89 \times 10^{-5}$  for SUPERGNOVA) for all sleep conditions, and fMRI traits  
32 contributed the largest proportion of significant findings (**Figs. 5B, S53, and Tables S8-S9**).

1 In comparison with LDSC, both methods revealed more genetic correlations with task  
2 fMRI. For example, among the 777 significant local genetic correlations identified by LAVA,  
3 46.98% (365/777) were related to task fMRI traits. More than 10% (39/365) of the task  
4 fMRI-sleep local genetic correlations were located in the 19q13.32 region, which was the  
5 locus identified in our association lookup analysis for task fMRI. In addition to 19q13.32,  
6 other top-ranking putative pleiotropic regions for task fMRI were 16q12.2, 14q11.2,  
7 7p15.1, and 15q26.2. Moreover, sleep-imaging genetic connections can vary across  
8 genomic regions or even be opposites. For example, chronotype had a positive local  
9 genetic correlation with left MBelt area task amplitude in 1p13.2 ( $GC = 0.574$ ,  $P = 1.10 \times 10^{-4}$ ),  
10 but negative correlation in 16q12.2 ( $GC = -0.466$ ,  $P = 1.87 \times 10^{-4}$ ). These results  
11 demonstrate the complex genetic co-architecture of sleep and imaging traits.

12

### 13 **Causal genetic relationships detected by Mendelian randomization.**

14 To investigate the causal genetic links between sleep and imaging traits, we performed  
15 Mendelian randomization (MR) analyses with their GWAS summary statistics (Methods).  
16 At the Bonferroni significance level ( $P < 3.67 \times 10^{-5}$ ), we found strong evidence of genetic  
17 causal effects from brain structures to sleep conditions (**Table S10**). For example,  
18 increased left ventral DC volume had genetic causal effects on being a morning person ( $\beta$   
19  $= -0.102$ ,  $SE = 0.021$ ,  $P = 1.71 \times 10^{-6}$ ). All of the MR methods tested indicated the same  
20 causal genetic effects direction, and two of them were able to survive the Bonferroni  
21 multiple testing procedure. In addition, larger subcortical volumes were causally related  
22 to increased risk of daytime nap ( $\beta = 0.046$ ,  $SE = 0.01$ ,  $P = 3.81 \times 10^{-6}$  for the left accumbens  
23 area, and  $\beta = 0.038$ ,  $SE = 0.009$ ,  $P = 1.14 \times 10^{-5}$  for the right hippocampus). By balancing  
24 adenosine and dopamine activity, the accumbens played an important role in regulating  
25 sleep-wake patterns<sup>106,107</sup>. Furthermore, there was a significant genetic causal  
26 relationship between larger total brain volume and longer sleep duration ( $\beta = 0.055$ ,  $SE =$   
27  $0.01$ ,  $P = 1.08 \times 10^{-5}$ ). For DTI parameters, we found a causal link between higher MO of  
28 the external capsule tract and being an evening person ( $\beta = -0.085$ ,  $SE = 0.02$ ,  $P = 6.04 \times 10^{-6}$ ).  
29 All these results were summarized in **Figure S54**. There was no evidence of a causal  
30 relationship in another direction (in which sleep traits was the exposure and brain  
31 structural traits was the outcomes) after Bonferroni correction.

32

1 More genetic causal effects from brain structures to sleep were found at the FDR 5% level  
2 ( $P$  range =  $[1.71 \times 10^{-6}, 2.09 \times 10^{-3}]$ ). In total, 73 imaging-sleep causal pairs were identified,  
3 most of which were related to DTI parameters (42/73) and regional brain volumes (29/73).  
4 DTI parameters from multiple white matter tracts showed genetic causal effects on sleep  
5 conditions, such as sleep duration, daytime nap, and chronotype. More volumetric traits  
6 were found to have causal effects on sleep. For example, several MR methods have  
7 consistently demonstrated that total brain volume has a causal genetic influence on  
8 insomnia ( $\beta < -0.044$ ,  $P < 1.93 \times 10^{-4}$ ). In summary, our MR analysis suggested a causal  
9 genetic pathway from brain structures to sleep conditions.

10

### 11 **Sleep and mental health predictions by integrating multiple data types**

12 According to our imaging genetics analyses, genetic data and multimodal brain and  
13 cardiac images could possibly be combined to predict sleep conditions. In clinical and  
14 epidemiological studies, sleep has also been reported to be affected by environmental  
15 factors, behaviors, biomarkers, and disease status, which makes it desirable to develop  
16 sleep prediction models that incorporate imaging genetics and other forms of data. In this  
17 section, we performed sleep predictions based on a variety of data types. Our goal is to  
18 understand the contributions made by these types of data and their relative performance  
19 in predicting different sleep disorders and traits. Our analysis focused on multi-modality  
20 brain and cardiac MRI traits, sleep polygenic risk score (PRS), biomarkers, disease status,  
21 and 6 categories of environmental variables, including lifestyle and environment,  
22 psychosocial factors, physical measures, local environments, and early life factors (**Table**  
23 **S11**). We used a training, validation, and testing design, where all model parameters were  
24 tuned on validation data, and prediction performance was assessed on independent  
25 testing data. Detailed information on model training and adjusted covariates can be found  
26 in the Methods section.

27

28 **Figure 6A** summarized the results of 7 different sleep conditions using different types of  
29 brain imaging data. All sleep conditions were significantly predicted by resting fMRI  
30 (prediction correlation  $\beta$  range =  $[0.040, 0.121]$ ,  $P$  range =  $[9.82 \times 10^{-4}, 4.05 \times 10^{-23}]$ ). The  
31 ICA-based and parcellation-based resting fMRI traits, as well as the amplitude and  
32 functional connectivity traits, showed similar trends, although their relative performance



1 may vary depending on the sleep characteristics being predicted. Each of the regional  
2 brain volumes, DTI parameters, and task fMRI traits can significantly predict at least five  
3 sleep conditions (**Table S12**). As for sleep duration, chronotype, and insomnia, adding  
4 these additional imaging types will not improve prediction performance over and above  
5 resting fMRI, suggesting that resting fMRI is largely responsible for the prediction power  
6 of other imaging modalities. As an example, both regional brain volumes and task-related  
7 fMRI traits were marginally significant in predicting sleep duration ( $\beta$  range = [0.030,  
8 0.042],  $P$  range = [ $2.47 \times 10^{-2}$ ,  $7.28 \times 10^{-4}$ ]). Using regional brain volumes, task fMRI traits,  
9 and resting fMRI traits together did not result in a better performance than using resting  
10 fMRI alone ( $\beta = 0.116$  vs.  $0.120$ ). These results suggest that among the imaging modalities  
11 tested in this study, resting fMRI showed the strongest correlation with the three sleep  
12 traits, and it may be the most effective imaging modality to predict insomnia.

13

14 In the case of getting up, snoring, daytime nap, and narcolepsy, it will be beneficial to  
15 integrate multiple imaging modalities rather than using one type of data. For example,  
16 task fMRI had the best prediction performance in predicting snoring across different  
17 imaging modalities ( $\beta$  range = [0.068, 0.085],  $P = [2.81 \times 10^{-7}$ ,  $1.55 \times 10^{-10}]$ ). Snoring can also  
18 be significantly predicted by DTI parameters, regional brain volumes, and resting fMRI  
19 traits ( $\beta$  range = [0.040, 0.063],  $P$  range = [ $1.25 \times 10^{-3}$ ,  $2.23 \times 10^{-7}$ ]). When all these imaging  
20 types were combined, the prediction accuracy increased to 0.103 ( $P = 1.68 \times 10^{-14}$ ),  
21 suggesting that each imaging type contributes additionally to the prediction of snoring. In  
22 another example, when combining DTI parameters, regional brain volume, and resting  
23 fMRI traits, the prediction performance moved up to 0.109 ( $P = 1.14 \times 10^{-18}$ ) for nap during  
24 day.

25

26 Next, we evaluated more data types in sleep prediction (**Fig. 6B**). Cardiac MRI traits were  
27 significantly predictive of 6 sleep traits, with the highest prediction accuracy observed for  
28 snoring ( $\beta = 0.067$ ,  $P = 1.57 \times 10^{-6}$ ). Insomnia can be more accurately predicted by using  
29 brain and cardiac MRI traits jointly ( $\beta = 0.087$ ,  $P = 8.39 \times 10^{-10}$ , **Fig. S55**). In addition, sleep  
30 PRS were significant predictors for all sleep conditions ( $\beta$  range = [0.108, 0.201],  $P$  range  
31 = [ $2.46 \times 10^{-15}$ ,  $1.71 \times 10^{-49}$ ]). Six different PRS methods were used, and all provided similar  
32 results (**Fig. S56** and **Table S12**). The combination of PRS and brain imaging data increases

1 prediction accuracy for all sleep traits, with narcolepsy showing the greatest  
2 improvement. PRS and imaging traits had a prediction accuracy of 0.108 ( $P = 2.46 \times 10^{-15}$ )  
3 and 0.124 ( $P = 2.68 \times 10^{-20}$ ), respectively, for narcolepsy. The performance increased to  
4 0.159 ( $P = 5.15 \times 10^{-30}$ ) after combination.

5

6 Sleep conditions were also strongly predicted by biomarkers and environmental variables.  
7 The highest prediction accuracy of biomarker was observed on snoring ( $\beta = 0.081$ ,  $P =$   
8  $4.98 \times 10^{-10}$ ). Environmental variables were much better at predicting insomnia and getting  
9 up than PRS and imaging traits. For example, the prediction accuracy of environmental  
10 variables was 0.226 ( $P = 5.25 \times 10^{-68}$ ) for insomnia, which was largely contributed by the  
11 psychosocial factors ( $\beta = 0.202$ ,  $P = 2.15 \times 10^{-54}$ , **Fig. S57**). More importantly, combining  
12 PRS, imaging, and environmental variables resulted in a higher level of accuracy when  
13 predicting all sleep traits. Narcolepsy and snoring were predicted similarly by the three  
14 types of data ( $\beta$  range = [0.108, 0.122],  $P$  range = [ $2.46 \times 10^{-15}$ ,  $4.58 \times 10^{-19}$ ] for PRS;  $\beta$  range  
15 = [0.103, 0.124],  $P$  range = [ $1.68 \times 10^{-14}$ ,  $2.68 \times 10^{-20}$ ] for brain imaging;  $\beta$  range = [0.113,  
16 0.121],  $P$  range = [ $1.07 \times 10^{-11}$ ,  $1.01 \times 10^{-17}$ ] for environmental variables), and the accuracy  
17 increased by more than 50% when they were combined ( $\beta$  range = [0.180, 0.198],  $P$  range  
18 = [ $1.17 \times 10^{-19}$ ,  $8.01 \times 10^{-30}$ ]). In general, imaging, genetics, and environment all play key  
19 roles in predicting sleep variations. Integrating multiple types of data could benefit sleep  
20 prediction in clinical applications and research.

21

22 Mental health problems were highly comorbid with sleep disorders<sup>108,109</sup>. In order to gain  
23 a better understanding of how sleep contributes to mental health problems, we assessed  
24 the predictive power of sleep traits for three mental health traits: depression, neuroticism,  
25 and anxiety. We adjusted the same covariates as the above sleep prediction analysis and  
26 additionally examined other data types (Methods). For all three mental health traits,  
27 sleep traits and early life factors were among the top two strongest predictors ( $\beta$  range =  
28 [0.178, 0.316],  $P$  range = [ $9.24 \times 10^{-43}$ ,  $8.21 \times 10^{-135}$ ], **Figs. 6C, S58, and Table S13**). These  
29 mental health traits were also significantly predicted by brain imaging and mental health  
30 PRS ( $\beta$  range = [0.034, 0.152],  $P$  range = [ $4.84 \times 10^{-3}$ ,  $8.43 \times 10^{-29}$ ], **Figs. 6C and S58**). A  
31 combination of all predictors increased the prediction correlation to 0.413 for neuroticism,  
32 0.353 for depression, and 0.277 for anxiety ( $P$  range = [ $5.65 \times 10^{-91}$ ,  $1.83 \times 10^{-176}$ ]).

1 Furthermore, when sleep conditions were controlled as covariates, the prediction power  
2 of many traits was reduced, suggesting that sleep may partially explain their predictive  
3 power (**Figs. 6D and S58**). For example, after conditioning on sleep, electronic devices  
4 usage no longer had significant predictive power for neuroticism or depression; and  
5 alcohol, physical activity, and sun exposure did not have significant predictive power for  
6 anxiety. In addition, prediction performance of early life factors on neuroticism decreased  
7 from 0.178 ( $P = 9.24 \times 10^{-43}$ ) to 0.147 ( $P = 3.80 \times 10^{-32}$ ), suggesting 17.7% prediction power  
8 of early life factors on neuroticism could be mediated by sleep. The proportion of  
9 reduction was 16.1% for mental health PRS and 28.7% for disease status. Similar  
10 reduction was also found in prediction power of PRS and early life factors for depression  
11 and anxiety. In summary, sleep was an important predictor of mental health traits and  
12 may be able to mediate the influence of genetic and nongenetic risk factors on mental  
13 health.

14

## 15 **DISCUSSION**

16 Sleep is vital to both physical health and mental wellbeing. Understanding how sleep  
17 interacts with human health is of great interest. This study aimed to identify novel  
18 phenotypic and genetic connections between sleep-related conditions and human brain  
19 and heart health by using multimodal imaging data as endophenotypes. In our study, we  
20 found substantial links between sleep and the structure and function of the brain and the  
21 heart, some of which can be explained by shared genetic influences. We examined the  
22 genetic basis of sleep-imaging connections from a variety of perspectives, including the  
23 genetic loci that were jointly significant, the genetic covariance at the local level, and the  
24 genetic similarity across the genome. Based on MR analysis, sleep conditions have been  
25 found to be more a consequence than a cause of brain structural differences along the  
26 genetic pathway, matching the results in a recent study specially on sleep duration and  
27 brain structure<sup>32</sup>. Using prediction analysis, we assessed the relative contributions of  
28 genetic and imaging factors to sleep prediction and integrated them with additional  
29 environmental data to provide a more accurate prediction. Future epidemiological and  
30 clinical studies of sleep and comorbid conditions may benefit from these findings and  
31 insights.

32

1 In our study, we found that sleep and brain functions are strongly linked through multiple  
2 functional networks, including the default mode network. Several studies have shown  
3 that the default mode network activity is essential to conscious awareness<sup>74,110,111</sup>, which  
4 may provide an opportunity to investigate the relation between sleepiness and decreased  
5 functional connectivity of the default mode network. Daytime sleepiness is generally  
6 considered a clinical symptom of sleep disorders or a consequence of insufficient sleep.  
7 The symptoms of insomnia and sleep deprivation are usually accompanied by  
8 sleepiness<sup>112</sup>, which both have been linked to reduced connectivity in the brain's default  
9 mode network<sup>70,113</sup>. Narcolepsy is a rare neurological disorder characterized by daytime  
10 sleepiness and the presence, or absence, of cataplexy-like episodes<sup>114,115</sup>. The cause of  
11 narcolepsy is determined by both genetic and environmental factors<sup>116</sup>, and it may lead  
12 to adverse cardiovascular events<sup>117</sup>. Our phenotypic and genetic results reveal possible  
13 mechanisms of default mode network brain activity that underlie these sleep disorders.

14

15 The present study has a few limitations. First, our analyses were mainly based on  
16 European subjects in the UKB study. In future studies, data from a broader range of  
17 sources could be incorporated into the imaging genetics study of sleep, and findings  
18 developed by UKB could be generalized to global populations. The current study focused  
19 on the human brain and heart, which are two important organs of the human body. Using  
20 abdominal images, such as those of the kidneys and liver<sup>118</sup>, it would be interesting to  
21 determine how sleep is connected to more organs. Finally, we focused primarily on linear  
22 relationships in our models. Several recent studies have demonstrated that certain sleep  
23 traits may also have nonlinear phenotypic and genetic links (such as sleep duration<sup>30,31</sup>).  
24 In the future, advanced statistical and machine learning methods may be used to identify  
25 more comprehensive relationships and improve prediction performance.

26

## 27 **METHODS**

28 Methods are available in the **Methods** section.

29 *Note: One supplementary information pdf file and one supplementary table zip file are*  
30 *available.*

31

## 32 **ACKNOWLEDGEMENTS**

1 We thank the individuals represented in the UK Biobank for their participation and the  
2 research teams for their work in collecting, processing and disseminating these datasets  
3 for analysis. We would like to thank the University of North Carolina at Chapel Hill and  
4 Purdue University and their research computing groups for providing computational  
5 resources and support that have contributed to these research results. We gratefully  
6 acknowledge all the studies and databases that made GWAS and eQTL summary-level  
7 data publicly available. This research has been conducted using the UK Biobank resource  
8 (application number 22783), subject to a data transfer agreement.

9

#### 10 **AUTHOR CONTRIBUTIONS**

11 B.Z. designed the study. Z.F., B.Z., J.S., X.Y., B.L., J.L., and T.L. analyzed the data. Y.L., Z.F.,  
12 and B.Z. designed the website and developed online resources. Q.W., P.P., T.L., and H.Z.  
13 provide comments and interpret the results. Z.F. and B.Z. wrote the manuscript with  
14 feedback from all authors.

15

16 **CORRESPONDENCE AND REQUESTS FOR MATERIALS** should be addressed to B.Z.

17

#### 18 **COMPETING FINANCIAL INTERESTS**

19 The authors declare no competing financial interests.

20

#### 21 **REFERENCES**

- 22 1. Tao, F. *et al.* Associations of sleep duration and quality with incident  
23 cardiovascular disease, cancer, and mortality: a prospective cohort study of  
24 407,500 UK biobank participants. *Sleep Medicine* **81**, 401-409 (2021).
- 25 2. Vendette, M. *et al.* REM sleep behavior disorder predicts cognitive impairment in  
26 Parkinson disease without dementia. *Neurology* **69**, 1843-1849 (2007).
- 27 3. Postuma, R.B. *et al.* Risk and predictors of dementia and parkinsonism in  
28 idiopathic REM sleep behaviour disorder: a multicentre study. *Brain* **142**, 744-  
29 759 (2019).
- 30 4. Sabia, S. *et al.* Association of sleep duration in middle and old age with incidence  
31 of dementia. *Nature Communications* **12**, 1-10 (2021).

- 1 5. Cappuccio, F.P., Cooper, D., D'Elia, L., Strazzullo, P. & Miller, M.A. Sleep duration  
2 predicts cardiovascular outcomes: a systematic review and meta-analysis of  
3 prospective studies. *European heart journal* **32**, 1484-1492 (2011).
- 4 6. Lao, X.Q. *et al.* Sleep quality, sleep duration, and the risk of coronary heart  
5 disease: a prospective cohort study with 60,586 adults. *Journal of Clinical Sleep*  
6 *Medicine* **14**, 109-117 (2018).
- 7 7. Jike, M., Itani, O., Watanabe, N., Buysse, D.J. & Kaneita, Y. Long sleep duration  
8 and health outcomes: a systematic review, meta-analysis and meta-regression.  
9 *Sleep medicine reviews* **39**, 25-36 (2018).
- 10 8. Nagai, M., Hoshida, S. & Kario, K. Sleep duration as a risk factor for  
11 cardiovascular disease-a review of the recent literature. *Current cardiology*  
12 *reviews* **6**, 54-61 (2010).
- 13 9. Genuardi, M.V. *et al.* Association of short sleep duration and atrial fibrillation.  
14 *Chest* **156**, 544-552 (2019).
- 15 10. Morovatdar, N. *et al.* Sleep duration and risk of atrial fibrillation: a systematic  
16 review. *Journal of atrial Fibrillation* **11**(2019).
- 17 11. Titova, O.E., Michaëlsson, K. & Larsson, S.C. Sleep duration and stroke:  
18 prospective cohort study and mendelian randomization analysis. *Stroke* **51**,  
19 3279-3285 (2020).
- 20 12. Nikbakhtian, S. *et al.* Accelerometer-Derived Sleep Onset Timing and  
21 Cardiovascular Disease Incidence: A UK Biobank Cohort Study. *Available at SSRN*  
22 *3857637*.
- 23 13. Freeman, D., Sheaves, B., Waite, F., Harvey, A.G. & Harrison, P.J. Sleep  
24 disturbance and psychiatric disorders. *The Lancet Psychiatry* **7**, 628-637 (2020).
- 25 14. Alvaro, P.K., Roberts, R.M. & Harris, J.K. A systematic review assessing  
26 bidirectionality between sleep disturbances, anxiety, and depression. *Sleep* **36**,  
27 1059-1068 (2013).
- 28 15. Koffel, E., Khawaja, I.S. & Germain, A. Sleep disturbances in posttraumatic stress  
29 disorder: updated review and implications for treatment. *Psychiatric annals* **46**,  
30 173-176 (2016).
- 31 16. Kaskie, R.E., Graziano, B. & Ferrarelli, F. Schizophrenia and sleep disorders: links,  
32 risks, and management challenges. *Nature and science of sleep* **9**, 227 (2017).

- 1 17. Lee, M.-J. *et al.* Comorbidity of narcolepsy and depressive disorders: a  
2 nationwide population-based study in Taiwan. *Sleep medicine* **39**, 95-100 (2017).
- 3 18. Khurshid, K.A. Comorbid insomnia and psychiatric disorders: an update.  
4 *Innovations in clinical neuroscience* **15**, 28 (2018).
- 5 19. Petersen, S.E. *et al.* UK Biobank's cardiovascular magnetic resonance protocol.  
6 *Journal of cardiovascular magnetic resonance* **18**, 1-7 (2015).
- 7 20. Littlejohns, T.J., Sudlow, C., Allen, N.E. & Collins, R. UK Biobank: opportunities for  
8 cardiovascular research. *European heart journal* **40**, 1158-1166 (2019).
- 9 21. Miller, K.L. *et al.* Multimodal population brain imaging in the UK Biobank  
10 prospective epidemiological study. *Nature Neuroscience* **19**, 1523-1536 (2016).
- 11 22. Thompson, P.M. *et al.* ENIGMA and global neuroscience: A decade of large-scale  
12 studies of the brain in health and disease across more than 40 countries.  
13 *Translational psychiatry* **10**, 1-28 (2020).
- 14 23. de Oliveira, F.G., Pinto, I., Valdigem, B., Senra, T. & Bertolami, A. Evaluation of  
15 late atrial enhancement by cardiac magnetic resonance imaging in patients with  
16 obstructive sleep apnea. *Sleep Medicine* **74**, 204-210 (2020).
- 17 24. Curta, A. *et al.* Subclinical Changes in Cardiac Functional Parameters as  
18 Determined by Cardiovascular Magnetic Resonance (CMR) Imaging in Sleep  
19 Apnea and Snoring: Findings from UK Biobank. *Medicina* **57**, 555 (2021).
- 20 25. Fjell, A.M. *et al.* Self-reported sleep relates to hippocampal atrophy across the  
21 adult lifespan: results from the Lifebrain consortium. *Sleep* **43**, zsz280 (2020).
- 22 26. Sexton, C.E., Storsve, A.B., Walhovd, K.B., Johansen-Berg, H. & Fjell, A.M. Poor  
23 sleep quality is associated with increased cortical atrophy in community-dwelling  
24 adults. *Neurology* **83**, 967-973 (2014).
- 25 27. Zitser, J. *et al.* Sleep duration over 28 years, cognition, gray matter volume, and  
26 white matter microstructure: a prospective cohort study. *Sleep* **43**, zsz290  
27 (2020).
- 28 28. Amorim, L. *et al.* Poor sleep quality associates with decreased functional and  
29 structural brain connectivity in normative aging: a MRI multimodal approach.  
30 *Frontiers in aging neuroscience* **10**, 375 (2018).
- 31 29. Li, G. *et al.* Magnetic resonance study on the brain structure and resting-state  
32 brain functional connectivity in primary insomnia patients. *Medicine* **97**(2018).

- 1 30. Li, Y. *et al.* The brain structure and genetic mechanisms underlying the nonlinear  
2 association between sleep duration, cognition and mental health. *Nature Aging*  
3 **2**, 425-437 (2022).
- 4 31. Tai, X.Y., Chen, C., Manohar, S. & Husain, M. Impact of sleep duration on  
5 executive function and brain structure. *Communications biology* **5**, 1-10 (2022).
- 6 32. Fjell, A.M. *et al.* Sleep duration and brain structure – phenotypic associations and  
7 genotypic covariance. *bioRxiv*, 2022.02.15.480501 (2022).
- 8 33. Smith, S.M. & Nichols, T.E. Statistical challenges in “big data” human  
9 neuroimaging. *Neuron* **97**, 263-268 (2018).
- 10 34. Marek, S. *et al.* Towards reproducible brain-wide association studies. *BioRxiv*  
11 (2020).
- 12 35. Krohn, L. *et al.* Genome-wide association study of REM sleep behavior disorder  
13 identifies novel loci with distinct polygenic and brain expression effects. *medRxiv*  
14 (2021).
- 15 36. Dashti, H.S. *et al.* Genetic determinants of daytime napping and effects on  
16 cardiometabolic health. *Nature communications* **12**, 1-15 (2021).
- 17 37. Dashti, H.S. *et al.* Genome-wide association study identifies genetic loci for self-  
18 reported habitual sleep duration supported by accelerometer-derived estimates.  
19 *Nature communications* **10**, 1-12 (2019).
- 20 38. Doherty, A. *et al.* GWAS identifies 10 loci for objectively-measured physical  
21 activity and sleep with causal roles in cardiometabolic disease. *bioRxiv*, 261719  
22 (2018).
- 23 39. Jansen, P.R. *et al.* Genome-wide analysis of insomnia in 1,331,010 individuals  
24 identifies new risk loci and functional pathways. *Nature Genetics* **51**, 394-403  
25 (2019).
- 26 40. Jones, S.E. *et al.* Genetic studies of accelerometer-based sleep measures yield  
27 new insights into human sleep behaviour. *Nature communications* **10**, 1-12  
28 (2019).
- 29 41. Lane, J.M. *et al.* Genome-wide association analyses of sleep disturbance traits  
30 identify new loci and highlight shared genetics with neuropsychiatric and  
31 metabolic traits. *Nature genetics* **49**, 274-281 (2017).



- 1 42. Lane, J.M. *et al.* Biological and clinical insights from genetics of insomnia  
2 symptoms. *Nature genetics* **51**, 387-393 (2019).
- 3 43. Wang, H. *et al.* Genome-wide association analysis of self-reported daytime  
4 sleepiness identifies 42 loci that suggest biological subtypes. *Nature*  
5 *communications* **10**, 1-12 (2019).
- 6 44. Watanabe, K. *et al.* Genome-wide meta-analysis of insomnia in over 2.3 million  
7 individuals indicates involvement of specific biological pathways through gene-  
8 prioritization. *medRxiv* (2020).
- 9 45. Lane, J.M. *et al.* Genetics of circadian rhythms and sleep in human health and  
10 disease. *Nature Reviews Genetics*, 1-17 (2022).
- 11 46. Hernandez, L.M. *et al.* Decoupling sleep and brain size in childhood: An  
12 investigation of genetic covariation in the ABCD study. *medRxiv*, 2020.10.  
13 02.20204735 (2021).
- 14 47. Aung, N. *et al.* Genome-wide analysis of left ventricular image-derived  
15 phenotypes identifies fourteen loci associated with cardiac morphogenesis and  
16 heart failure development. *Circulation* **140**, 1318-1330 (2019).
- 17 48. Córdova-Palomera, A. *et al.* Cardiac Imaging of Aortic Valve Area From 34 287 UK  
18 Biobank Participants Reveals Novel Genetic Associations and Shared Genetic  
19 Comorbidity With Multiple Disease Phenotypes. *Circulation: Genomic and*  
20 *Precision Medicine* **13**, e003014 (2020).
- 21 49. Meyer, H.V. *et al.* Genetic and functional insights into the fractal structure of the  
22 heart. *Nature* **584**, 589-594 (2020).
- 23 50. Pirruccello, J.P. *et al.* Analysis of cardiac magnetic resonance imaging in 36,000  
24 individuals yields genetic insights into dilated cardiomyopathy. *Nature*  
25 *communications* **11**, 1-10 (2020).
- 26 51. Pirruccello, J.P. *et al.* Genetic Analysis of Right Heart Structure and Function in  
27 40,000 People. *bioRxiv* (2021).
- 28 52. Thanaj, M. *et al.* Genetic and environmental determinants of diastolic heart  
29 function. *medRxiv* (2021).
- 30 53. Elliott, L.T. *et al.* Genome-wide association studies of brain imaging phenotypes  
31 in UK Biobank. *Nature* **562**, 210-216 (2018).

- 1 54. Zhao, B. *et al.* Genome-wide association analysis of 19,629 individuals identifies  
2 variants influencing regional brain volumes and refines their genetic co-  
3 architecture with cognitive and mental health traits. *Nature genetics* **51**, 1637-  
4 1644 (2019).
- 5 55. Smith, S.M. *et al.* An expanded set of genome-wide association studies of brain  
6 imaging phenotypes in UK Biobank. *Nature neuroscience* **24**, 737-745 (2021).
- 7 56. Zhao, B. *et al.* Common genetic variation influencing human white matter  
8 microstructure. *Science* **372**(2021).
- 9 57. Grasby, K.L. *et al.* The genetic architecture of the human cerebral cortex. *Science*  
10 **367**(2020).
- 11 58. Zhao, B. *et al.* Genetic influences on the intrinsic and extrinsic functional  
12 organizations of the cerebral cortex. *medRxiv* (2021).
- 13 59. Sudlow, C. *et al.* UK biobank: an open access resource for identifying the causes  
14 of a wide range of complex diseases of middle and old age. *PLoS medicine* **12**,  
15 e1001779 (2015).
- 16 60. Zhao, B. *et al.* Heart-brain connections: phenotypic and genetic insights from  
17 40,000 cardiac and brain magnetic resonance images. *medRxiv* (2021).
- 18 61. Bai, W. *et al.* A population-based phenome-wide association study of cardiac and  
19 aortic structure and function. *Nature Medicine* **26**, 1654-1662 (2020).
- 20 62. Bijsterbosch, J. *et al.* Investigations into within-and between-subject resting-  
21 state amplitude variations. *Neuroimage* **159**, 57-69 (2017).
- 22 63. Bai, Y. *et al.* Resting-state functional connectivity of the sensory/somatomotor  
23 network associated with sleep quality: evidence from 202 young male samples.  
24 *Brain Imaging and Behavior*, 1-10 (2022).
- 25 64. Brooks, S.J., Katz, E.S. & Stamoulis, C. Shorter Duration and Lower Quality Sleep  
26 Have Widespread Detrimental Effects on Developing Functional Brain Networks  
27 in Early Adolescence. *Cerebral cortex communications* **3**, tgab062 (2022).
- 28 65. Gorgoni, M. *et al.* Sleep deprivation affects somatosensory cortex excitability as  
29 tested through median nerve stimulation. *Brain Stimul* **7**, 732-9 (2014).
- 30 66. Xiao, F. *et al.* Independent component analysis and graph theoretical analysis in  
31 patients with narcolepsy. *Neuroscience bulletin* **35**, 743-755 (2019).

- 1 67. Engström, M., Hallböök, T., Szakacs, A., Karlsson, T. & Landtblom, A.-M.  
2 Functional magnetic resonance imaging in narcolepsy and the Kleine–Levin  
3 syndrome. *Frontiers in neurology* **5**, 105 (2014).
- 4 68. Ji, J.L. *et al.* Mapping the human brain's cortical-subcortical functional network  
5 organization. *Neuroimage* **185**, 35-57 (2019).
- 6 69. Glasser, M.F. *et al.* A multi-modal parcellation of human cerebral cortex. *Nature*  
7 **536**, 171-178 (2016).
- 8 70. De Havas, J.A., Parimal, S., Soon, C.S. & Chee, M.W. Sleep deprivation reduces  
9 default mode network connectivity and anti-correlation during rest and task  
10 performance. *Neuroimage* **59**, 1745-51 (2012).
- 11 71. Robinson, J.L., Erath, S.A., Kana, R.K. & El-Sheikh, M. Neurophysiological  
12 differences in the adolescent brain following a single night of restricted sleep - A  
13 7T fMRI study. *Dev Cogn Neurosci* **31**, 1-10 (2018).
- 14 72. Samann, P.G. *et al.* Increased sleep pressure reduces resting state functional  
15 connectivity. *MAGMA* **23**, 375-89 (2010).
- 16 73. Yeshurun, Y., Nguyen, M. & Hasson, U. The default mode network: where the  
17 idiosyncratic self meets the shared social world. *Nature Reviews Neuroscience*  
18 **22**, 181-192 (2021).
- 19 74. Ferrier, J., Tiran, E., Deffieux, T., Tanter, M. & Lenkei, Z. Functional imaging  
20 evidence for task-induced deactivation and disconnection of a major default  
21 mode network hub in the mouse brain. *Proceedings of the National Academy of*  
22 *Sciences* **117**, 15270-15280 (2020).
- 23 75. Winer, J.R. *et al.* Association of short and long sleep duration with amyloid- $\beta$   
24 burden and cognition in aging. *JAMA neurology* **78**, 1187-1196 (2021).
- 25 76. García-Marín, L.M. *et al.* Evidence of genetic overlap between circadian  
26 preference and brain white matter microstructure. *Twin Research and Human*  
27 *Genetics* **24**, 1-6 (2021).
- 28 77. Rosenberg, J., Maximov, I., Reske, M., Grinberg, F. & Shah, N.J. "Early to bed,  
29 early to rise": diffusion tensor imaging identifies chronotype-specificity.  
30 *Neuroimage* **84**, 428-34 (2014).
- 31 78. Hu, F.B. *et al.* Snoring and risk of cardiovascular disease in women. *Journal of the*  
32 *American College of Cardiology* **35**, 308-313 (2000).

- 1 79. Facer-Childs, E. & Brandstaetter, R. The impact of circadian phenotype and time  
2 since awakening on diurnal performance in athletes. *Current biology* **25**, 518-522  
3 (2015).
- 4 80. Wang, Z. *et al.* Association of Sleep Duration, Napping, and Sleep Patterns With  
5 Risk of Cardiovascular Diseases: A Nationwide Twin Study. *Journal of the*  
6 *American Heart Association* **11**, e025969 (2022).
- 7 81. Li, X. *et al.* Adherence to a healthy sleep pattern and incident heart failure: a  
8 prospective study of 408 802 UK Biobank participants. *Circulation* **143**, 97-99  
9 (2021).
- 10 82. Fan, M. *et al.* Sleep patterns, genetic susceptibility, and incident cardiovascular  
11 disease: a prospective study of 385 292 UK biobank participants. *European heart*  
12 *journal* **41**, 1182-1189 (2020).
- 13 83. Buniello, A. *et al.* The NHGRI-EBI GWAS Catalog of published genome-wide  
14 association studies, targeted arrays and summary statistics 2019. *Nucleic Acids*  
15 *Research* **47**, D1005-D1012 (2018).
- 16 84. Zhao, B. *et al.* Common variants contribute to intrinsic human brain functional  
17 networks. *Nature Genetics in press* (2022).
- 18 85. Jones, S.E. *et al.* Genome-wide association analyses of chronotype in 697,828  
19 individuals provides insights into circadian rhythms. *Nature communications* **10**,  
20 343 (2019).
- 21 86. Lane, J.M. *et al.* Genome-wide association analysis identifies novel loci for  
22 chronotype in 100,420 individuals from the UK Biobank. *Nature communications*  
23 **7**, 1-10 (2016).
- 24 87. Thorp, J.G. *et al.* Genetic heterogeneity in self-reported depressive symptoms  
25 identified through genetic analyses of the PHQ-9. *Psychological Medicine* **50**,  
26 2385-2396 (2020).
- 27 88. Khor, S.-S. *et al.* Genome-wide association study of HLA-DQB1\* 06: 02 negative  
28 essential hypersomnia. *PeerJ* **1**, e66 (2013).
- 29 89. Doherty, A. *et al.* GWAS identifies 14 loci for device-measured physical activity  
30 and sleep duration. *Nature communications* **9**, 1-8 (2018).

- 1 90. Campos, A.I. *et al.* Insights into the aetiology of snoring from observational and  
2 genetic investigations in the UK Biobank. *Nature communications* **11**, 1-12  
3 (2020).
- 4 91. Giambartolomei, C. *et al.* Bayesian test for colocalisation between pairs of  
5 genetic association studies using summary statistics. *PLoS genetics* **10**, e1004383  
6 (2014).
- 7 92. Kibinge, N.K., Relton, C.L., Gaunt, T.R. & Richardson, T.G. Characterizing the  
8 causal pathway for genetic variants associated with neurological phenotypes  
9 using human brain-derived proteome data. *The American Journal of Human*  
10 *Genetics* **106**, 885-892 (2020).
- 11 93. Jones, S.E. *et al.* Genome-wide association analyses of chronotype in 697,828  
12 individuals provides insights into circadian rhythms. *Nat Commun* **10**, 343 (2019).
- 13 94. de Klein, N. *et al.* Brain expression quantitative trait locus and network analysis  
14 reveals downstream effects and putative drivers for brain-related diseases.  
15 *bioRxiv* (2021).
- 16 95. Menon, V. Large-scale brain networks and psychopathology: a unifying triple  
17 network model. *Trends in cognitive sciences* **15**, 483-506 (2011).
- 18 96. Emamian, F. *et al.* Alterations of subcortical brain structures in paradoxical and  
19 psychophysiological insomnia disorder. *Frontiers in psychiatry*, 611 (2021).
- 20 97. Leerssen, J. *et al.* Brain structural correlates of insomnia severity in 1053  
21 individuals with major depressive disorder: results from the ENIGMA MDD  
22 Working Group. *Translational psychiatry* **10**, 1-11 (2020).
- 23 98. Bulik-Sullivan, B. *et al.* An atlas of genetic correlations across human diseases  
24 and traits. *Nat Genet* **47**, 1236-41 (2015).
- 25 99. Alfaro-Almagro, F. *et al.* Image processing and Quality Control for the first 10,000  
26 brain imaging datasets from UK Biobank. *NeuroImage* **166**, 400-424 (2018).
- 27 100. Zou, Q.-H. *et al.* An improved approach to detection of amplitude of low-  
28 frequency fluctuation (ALFF) for resting-state fMRI: fractional ALFF. *Journal of*  
29 *neuroscience methods* **172**, 137-141 (2008).
- 30 101. Chen, H.-L. *et al.* White matter damage and systemic inflammation in obstructive  
31 sleep apnea. *Sleep* **38**, 361-370 (2015).

- 1 102. Jones, N.F. & Ikuta, T. Sleep Duration is Associated with Caudate Volume and  
2 Executive Function. (2022).
- 3 103. Holtstrand Hjälml, H. *et al.* Association between left atrial enlargement and  
4 obstructive sleep apnea in a general population of 71-year-old men. *Journal of*  
5 *Sleep Research* **27**, 254-260 (2018).
- 6 104. Werme, J., van der Sluis, S., Posthuma, D. & de Leeuw, C.A. An integrated  
7 framework for local genetic correlation analysis. *Nature genetics* **54**, 274-282  
8 (2022).
- 9 105. Zhang, Y. *et al.* SUPERGNOVA: local genetic correlation analysis reveals  
10 heterogeneous etiologic sharing of complex traits. *Genome Biol* **22**, 262 (2021).
- 11 106. Oishi, Y. *et al.* Slow-wave sleep is controlled by a subset of nucleus accumbens  
12 core neurons in mice. *Nature communications* **8**, 1-12 (2017).
- 13 107. Sardi, N.F., Tobaldini, G., Morais, R.N. & Fischer, L. Nucleus accumbens mediates  
14 the pronociceptive effect of sleep deprivation: the role of adenosine A2A and  
15 dopamine D2 receptors. *Pain* **159**, 75-84 (2018).
- 16 108. Taylor, D.J. *et al.* Comorbidity of chronic insomnia with medical problems. *Sleep*  
17 **30**, 213-218 (2007).
- 18 109. Ohayon, M.M. & Roth, T. What are the contributing factors for insomnia in the  
19 general population? *Journal of psychosomatic research* **51**, 745-755 (2001).
- 20 110. Luppi, A.I. *et al.* Consciousness-specific dynamic interactions of brain integration  
21 and functional diversity. *Nat Commun* **10**, 4616 (2019).
- 22 111. Horovitz, S.G. *et al.* Decoupling of the brain's default mode network during deep  
23 sleep. *Proc Natl Acad Sci U S A* **106**, 11376-81 (2009).
- 24 112. Stores, G. Clinical diagnosis and misdiagnosis of sleep disorders. *J Neurol*  
25 *Neurosurg Psychiatry* **78**, 1293-7 (2007).
- 26 113. Nie, X. *et al.* Functional connectivity of paired default mode network subregions  
27 in primary insomnia. *Neuropsychiatr Dis Treat* **11**, 3085-93 (2015).
- 28 114. Shan, L., Dauvilliers, Y. & Siegel, J.M. Interactions of the histamine and  
29 hypocretin systems in CNS disorders. *Nat Rev Neurol* **11**, 401-13 (2015).
- 30 115. Brown, J. & Makker, H.K. An approach to excessive daytime sleepiness in adults.  
31 *Bmj* **368**, m1047 (2020).

- 1 116. Sehgal, A. & Mignot, E. Genetics of sleep and sleep disorders. *Cell* **146**, 194-207  
2 (2011).
- 3 117. Jennum, P.J., Plazzi, G., Silvani, A., Surkin, L.A. & Dauvilliers, Y. Cardiovascular  
4 disorders in narcolepsy: Review of associations and determinants. *Sleep Med Rev*  
5 **58**, 101440 (2021).
- 6 118. Liu, Y. *et al.* Genetic architecture of 11 organ traits derived from abdominal MRI  
7 using deep learning. *Elife* **10**, e65554 (2021).
- 8 119. Littlejohns, T.J. *et al.* The UK Biobank imaging enhancement of 100,000  
9 participants: rationale, data collection, management and future directions.  
10 *Nature communications* **11**, 1-12 (2020).
- 11 120. Avants, B.B. *et al.* A reproducible evaluation of ANTs similarity metric  
12 performance in brain image registration. *Neuroimage* **54**, 2033-2044 (2011).
- 13 121. Jahanshad, N. *et al.* Multi-site genetic analysis of diffusion images and voxelwise  
14 heritability analysis: A pilot project of the ENIGMA-DTI working group.  
15 *Neuroimage* **81**, 455-469 (2013).
- 16 122. Kochunov, P. *et al.* Multi-site study of additive genetic effects on fractional  
17 anisotropy of cerebral white matter: comparing meta and megaanalytical  
18 approaches for data pooling. *Neuroimage* **95**, 136-150 (2014).
- 19 123. Bycroft, C. *et al.* The UK Biobank resource with deep phenotyping and genomic  
20 data. *Nature* **562**, 203-209 (2018).
- 21 124. Ge, T., Chen, C.-Y., Ni, Y., Feng, Y.-C.A. & Smoller, J.W. Polygenic prediction via  
22 Bayesian regression and continuous shrinkage priors. *Nature Communications*  
23 **10**, 1776 (2019).
- 24 125. Bulik-Sullivan, B. *et al.* An atlas of genetic correlations across human diseases  
25 and traits. *Nature Genetics* **47**, 1236-1241 (2015).
- 26 126. Consortium, I.H. Integrating common and rare genetic variation in diverse  
27 human populations. *Nature* **467**, 52-58 (2010).
- 28 127. Hemani, G. *et al.* The MR-Base platform supports systematic causal inference  
29 across the human phenome. *Elife* **7**(2018).
- 30 128. Chang, C.C. *et al.* Second-generation PLINK: rising to the challenge of larger and  
31 richer datasets. *Gigascience* **4**, 7 (2015).

- 1 129. Friedman, J., Hastie, T. & Tibshirani, R. Regularization paths for generalized linear  
2 models via coordinate descent. *Journal of statistical software* **33**, 1 (2010).
- 3 130. Mak, T.S.H., Porsch, R.M., Choi, S.W., Zhou, X. & Sham, P.C. Polygenic scores via  
4 penalized regression on summary statistics. *Genetic epidemiology* **41**, 469-480  
5 (2017).
- 6 131. Privé, F., Arbel, J. & Vilhjálmsson, B.J. LDpred2: better, faster, stronger.  
7 *Bioinformatics* **36**, 5424-5431 (2020).
- 8 132. Márquez-Luna, C. *et al.* Incorporating functional priors improves polygenic  
9 prediction accuracy in UK Biobank and 23andMe data sets. *Nature*  
10 *Communications* **12**, 1-11 (2021).
- 11 133. Yang, S. & Zhou, X. Accurate and scalable construction of polygenic scores in  
12 large biobank data sets. *The American Journal of Human Genetics* **106**, 679-693  
13 (2020).

14

## 15 **METHODS**

### 16 **Phenotypic sleep-imaging analyses.**

17 The UKB study (<https://www.ukbiobank.ac.uk/>) recruited approximately half a million  
18 participants aged between 40 and 69 years between 2006 and 2010<sup>59</sup>. The ethics approval  
19 of the UKB study was from the North West Multicentre Research Ethics Committee  
20 (approval number: 11/NW/0382). The UKB imaging study started in 2014 and aimed to  
21 collect multi-modal imaging data from 100,000 subjects<sup>119</sup>. Detailed procedures to  
22 generate brain and cardiac MRI traits used phenotypic analysis can be found in previous  
23 papers<sup>54,56,58,60,61</sup>. All these imaging traits were generated from the raw images in  
24 Category 100003 (<https://biobank.ndph.ox.ac.uk/showcase/label.cgi?id=100003>).  
25 Overall, we used 101 regional brain volumes and 63 cortical thickness measures from T1-  
26 weighted structural MRI image<sup>54,60</sup>, 110 DTI parameters from diffusion MRI image<sup>56</sup>, 92  
27 functional activity (amplitude) and connectivity traits from resting-state and task-based  
28 fMRI image<sup>58</sup>, respectively, as well as 82 cardiac MRI traits from the short-axis, long-axis,  
29 and aortic cine images<sup>61</sup>. These traits captured the structural and functional  
30 characteristics of the human brain, heart, and aorta. Briefly, the advanced normalization  
31 tools<sup>120</sup> (ANTs) was used to generate regional brain volumes for 98 cortical and subcortical  
32 areas, as well as 3 global brain volume measures, including the total gray matter volume,



1 total white matter volume, and total brain volume. Similarly, 63 global and regional  
2 cortical thickness measured were also generated by ANTs. In addition, we applied the  
3 ENIGMA-DTI pipeline<sup>121,122</sup> to diffusion MRI, and generated 110 tract-averaged  
4 parameters, including the fractional anisotropy (FA), mean diffusivity (MD), axial  
5 diffusivity (AD), radial diffusivity (RD), and mode of anisotropy (MO) for 21 predefined  
6 major white matter tracts, as well as across the whole brain ( $5 \times 22$ ). For fMRI, we used a  
7 parcellation-based approach with the Glasser360 atlas<sup>69</sup> and partitioned the cerebral  
8 cortex into 360 regions in 12 functional networks<sup>68</sup>, including the primary visual,  
9 secondary visual, auditory, somatomotor, cingulo-opercular, default mode, dorsal  
10 attention, frontoparietal, language, posterior multimodal, ventral multimodal, and  
11 orbito-affective networks. We calculated the mean amplitude of each network, the mean  
12 functional connectivity for each pair of networks (including within the same network),  
13 and the mean amplitude and mean functional connectivity of the whole cortex. As strong  
14 signals were identified in resting fMRI, we also considered the 64,620 ( $360 \times 359/2$ ) area-  
15 level high-resolution resting functional connectivity measures, which can provide more  
16 fine-grained details on functional organizations of cerebral cortex. The 82 cardiac MRI  
17 traits were from 6 categories, including 64 traits of left ventricle, 4 of left atrium, 4 of right  
18 ventricle, 4 of right atrium, 3 of ascending aorta, and 3 of descending aorta. See **Table S1**  
19 for the complete ID list of these traits.

20

21 We studied the sleep-imaging phenotypic relationships with 7 self-reported sleep traits:  
22 the sleep duration (*"About how many hours sleep do you get in every 24 hours? (please*  
23 *include naps)"*, Data field 1160); getting up in morning (*"On an average day, how easy do*  
24 *you find getting up in the morning? 1) not at all easy; 2) not very easy; 3) fairly easy; 4)*  
25 *very easy"*, Data field 1170); morning/evening person (chronotype, *"Do you consider*  
26 *yourself to be 1) definitely a 'morning' person; 2) more a 'morning' person than an*  
27 *'evening' person; 3) more an 'evening' person than a 'morning' person; 4) definitely an*  
28 *'evening' person?"*, Data field 1180); nap during day (*"Do you have a nap during the day?*  
29 *1) never/rarely; 2) sometimes; 3) usually."*, Data field 1190); sleeplessness/insomnia (*"Do*  
30 *you have trouble falling asleep at night or do you wake up in the middle of the night? 1)*  
31 *never/rarely; 2) sometimes; 3) usually."*, Data field 1200); snoring (*"Does your partner or*  
32 *a close relative or friend complain about your snoring?"*, Data field 1210); and daytime

1 dozing/sleeping (narcolepsy, “How likely are you to doze off or fall asleep during the  
2 daytime when you don't mean to? (e.g. when working, reading or driving) 1) never/rarely;  
3 2) sometimes; 3) often; 4) all of the time.”, Data field 1220). We used the data coded by  
4 the UKB study and removed the subjects with responses “do not know” or “prefer not to  
5 answer”. In our phenotypic analysis, we used the white British imaging individuals in UKB  
6 phases 1 to 3 data release (released up through 2020, average  $n = 29,025$ , mean age range  
7 = (45,82), mean = 64.15, standard error = 7.67, and proportion of female was 51.6%). We  
8 fitted linear models for each pair of sleep and imaging traits, in which we adjusted for the  
9 effects of age (at imaging), age-squared, sex, age-sex interaction, age-squared-sex  
10 interaction, imaging site code, the top 40 genetic principal components (PCs)<sup>123</sup>,  
11 volumetric scaling, head motion, head motion-squared, brain position, and brain position-  
12 squared<sup>53,55</sup>. For regional brain volumes and regional cortical thickness measures, we  
13 additionally adjusted for the total brain volume and global mean thickness, respectively,  
14 to remove the global effects. The values greater than five times the median absolute  
15 deviation from the median were removed in each imaging trait and continuous covariate  
16 variable. The  $P$  values from two-sided  $t$  test were reported (R version 3.6.0).

17  
18 We also performed the PRS-based association analysis for the same set of imaging traits.  
19 Specifically, we used the GWAS summary statistics of these imaging traits released by  
20 previous imaging GWAS studies<sup>54,56,58,60,61</sup> and constructed PRS based on PRS-CS<sup>124</sup>. We  
21 used all default parameters in the PRS-CS software (<https://github.com/getian107/PRScs>)  
22 and generated the PRS for all non-imaging individuals in the UKB study (removing relatives  
23 of the UKB imaging individuals). We then used these genetically predicted imaging traits  
24 to repeat the above association analysis with the 7 sleep traits in non-imaging unrelated  
25 white British UKB subjects (average  $n = 217,254$ , removing relatives of imaging subjects,  
26 Methods). We adjusted for the effects of age (at baseline), age-squared, sex, age-sex  
27 interaction, age-squared-sex interaction, and the top 40 genetic PCs<sup>123</sup>.

28

### 29 **Genetic sleep-imaging analyses.**

30 Our genetic analyses were mainly based on GWAS summary statistics of sleep-related  
31 traits and imaging traits from previous studies. First, we systematically looked for the  
32 genomic loci that were reported to be significant for both sleep and imaging traits. We

1 looked up the reported sleep-significant genetic variants in the NHGRI-EBI GWAS  
2 catalog<sup>83</sup> (<https://www.ebi.ac.uk/gwas/>, version 2022-07-09). Among these sleep-  
3 associated variants (and variants in LD with them,  $r^2 \geq 0.6$ ), we searched for those that  
4 were also reported to be significant in previous GWAS of brain and cardiac MRI traits,  
5 including 101 regional brain volumes<sup>54</sup>, 110 DTI parameters<sup>56</sup>, 1,777 ICA-based resting  
6 fMRI traits<sup>84</sup> (76 ICA-based amplitude traits and 1,701 ICA-based functional connectivity  
7 traits), 1,985 network-level parcellation-based resting and task fMRI traits<sup>58</sup> (1,066 for  
8 resting and 919 for task), and 82 cardiac MRI traits<sup>60</sup> (**Table S4**). For the sleep-significant  
9 genetic variants, we also searched to see whether they were reported brain eQTLs on  
10 MetaBrain (<https://www.metabrain.nl/>)<sup>94</sup>. Finally, we tested for whether the sleep and  
11 imaging traits had shared causal genetic variants using the Bayesian colocalization test<sup>91</sup>.

12  
13 We examined genetic correlation analysis between sleep and imaging traits via LDSC<sup>125</sup>  
14 (<https://github.com/bulik/ldsc/>, version 1.0.1). We collected and used 19 set of publicly  
15 available GWAS summary statistics for sleep traits (**Table S6**). For imaging traits, we  
16 screened the 101 regional brain volumes<sup>54</sup>, 110 DTI parameters<sup>56</sup>, 1,985 network-level  
17 parcellation-based resting and task fMRI traits<sup>58</sup> (1,066 for resting and 919 for task), and  
18 82 cardiac MRI traits<sup>60</sup>. To provide more details of the brain functional organization, we  
19 also examined the amplitude traits in each of the 360 brain regions for resting and task  
20 fMRI, respectively. The LD scores were calculated by LDSC and were based on the 1000  
21 Genomes European data. We used the default setups of LDSC, in which the HapMap3<sup>126</sup>  
22 variants and the variants in the major histocompatibility complex region were removed.

23  
24 Local genetic correlation analyses between sleep and imaging traits were performed  
25 separately using LAVA<sup>104</sup> (<https://github.com/josefin-werme/LAVA>) and SUPERGONA<sup>105</sup>  
26 (<https://github.com/qlu-lab/SUPERGNOVA>). We tested the same sets of GWAS summary  
27 statistics as used in the above LDSC analysis. We followed the tutorials of the two  
28 methods and used the default setups. In SUPERGONA, we removed all single nucleotide  
29 polymorphisms (SNPs) with missing values in GWAS summary statistics and minor allele  
30 frequency (MAF) less than 0.05. We used the provided 1000 Genomes European  
31 reference panel and the genome partition file. In LAVA, we input the GWAS summary  
32 statistics, the 1000 Genomes European reference genotype data file, and the provided

1 locus definition file. Within each locus, LAVA processed these input files and converted  
2 the marginal GWAS summary statistics to locus-specific joint effects. LAVA first performed  
3 univariate tests on all traits and loci to select those with sufficient local genetic signals.  
4 Bivariate tests were then performed on the selected loci and traits to examine their local  
5 genetic correlations.

6

7 We performed MR analyses using multiple methods in the two-sample MR package  
8 (<https://mrcieu.github.io/TwoSampleMR/>), including MR Egger, simple median, weighted  
9 median, panelized weighted median, and inverse variance weighted<sup>127</sup>. Bidirectional MR  
10 analyses were performed using GWAS summary statistics between each pair of sleep  
11 conditions and imaging traits, including 101 regional brain volumes<sup>54</sup>, 110 DTI  
12 parameters<sup>56</sup>, 92 network-level parcellation-based resting fMRI traits<sup>58</sup> (the same traits  
13 as in the phenotypic analysis), and 82 cardiac MRI traits<sup>60</sup>. GWAS summary statistics of  
14 sleep conditions were obtained from the IEU GWAS database  
15 (<https://gwas.mrcieu.ac.uk/>). To select independent strong genetic instrumental  
16 variables, exposure GWAS summary statistics were clumped by using Plink<sup>128</sup> (v1.9) with  
17  $P$ -value significance threshold being  $5 \times 10^{-8}$  ( $p_1$ ) and the secondary significance threshold  
18 for clumped genetic variants was also set to be  $5 \times 10^{-8}$  ( $p_2$ ). Physical distance threshold  
19 for clumping was  $kb = 1,000$ , LD threshold for clumping was  $r^2 = 0.01$ , and we used the  
20 1000 Genomes European reference panel. Genetic variants of the exposure remained  
21 were extracted from the outcome dataset via the *extract\_outcome\_data()* function with  
22 default parameters. Harmonization was further performed to ensure the effects of each  
23 genetic variant on exposure and outcome were corresponding to each other, which was  
24 done by the *harmonise\_data\_function()* with level of strictness in dealing with SNPs action  
25 = 2. Sleep-imaging pairs with number of SNPs less than 10 were discarded. MR was then  
26 conducted with the *mr()* function with the above methods.

27

## 28 **Integrative prediction models for sleep and mental health traits.**

29 We developed prediction models for sleep by using genetic variants, imaging traits, and a  
30 wide range of other data types, such as biomarkers, disease status, and 6 categories of  
31 environmental variables, including lifestyle and environment, psychosocial factors,  
32 physical measures, local environments, early life factors, and cognitive functions (**Table**

1 **S11**). First, we considered performance of the following imaging predictors: 101 regional  
2 brain volumes<sup>54</sup>, 110 DTI parameters<sup>56</sup>, 1,777 ICA-based resting fMRI traits<sup>84</sup>, 1,985  
3 network-level parcellation-based resting and task fMRI traits<sup>58</sup>, 720 area-level  
4 parcellation-based resting and task fMRI amplitude traits (360 each), and 82 cardiac MRI  
5 traits<sup>60</sup>. We focused on the unrelated white British subjects and randomly divided the  
6 data into three independent parts: training (average  $n = 20270$ ), validation (average  $n =$   
7  $6790$ ), and testing (average  $n = 6764$ ). We estimated the effect sizes of these imaging  
8 traits by ridge regression in the glmnet<sup>129</sup> package (R version 3.6.0). The same set of the  
9 covariates as in the phenotypic association analysis were controlled. Model parameters  
10 were tuned on validation data, and prediction performance was evaluated on testing data  
11 by calculating the correlation between predicted and observed sleep traits. Next, we  
12 examined the performance of genetic PRS for sleep traits. Data from all UKB white British  
13 subjects were used as training data, except for those in the above validation and testing  
14 data (and their relatives). We adjusted for the effects of age (at baseline), age-squared,  
15 sex, age-sex interaction, age-squared-sex interaction, and the top 40 genetic PCs. We  
16 developed using 6 different methods, including pruning and thresholding (P + T),  
17 lassosum<sup>130</sup>, LDpred2<sup>131</sup>, LDpred-funct<sup>132</sup>, DBSLMM<sup>133</sup>, and PRSCS<sup>124</sup>. The above validation  
18 dataset was used to tune the parameters. We also used other data types as predictors  
19 with ridge regressions. To help interpret and identify the top-ranking predictors from each  
20 category, we also performed phenotypic associations between these variables and sleep  
21 traits and shared the results in **Table S14** and our website. The performance was evaluated  
22 on the subjects with all these data types in the testing dataset. Similar prediction models  
23 were also developed on three mental health traits, where sleep traits were added as  
24 predictors.

25

#### 26 **Code availability**

27 We made use of publicly available software and tools. The codes are available upon  
28 reasonable request.

29

#### 30 **Data availability**

31 GWAS summary statistics of brain and cardiac MRI traits can be freely downloaded at BIG-  
32 KP <https://bigkp.org/> and Heart-KP <https://heartkp.org/>. GWAS summary statistics of

1 sleep conditions used in this study are publicly available and the links can be found in  
2 Table S6. The individual level UK Biobank data used in this study can be obtained from  
3 <https://www.ukbiobank.ac.uk/>. We have built an interactive web browser to share our  
4 results at [www.ig4sleep.org](http://www.ig4sleep.org).

5

## 6 **Figure legends**

### 7 **Fig. 1 Overview of our imaging genetics studies for sleep.**

8 Multimodal brain and cardiac imaging were used to investigate the relationship between  
9 sleep and brain and heart health. We covered a full spectrum of imaging modalities,  
10 including T1-weighted structural MRI, diffusion MRI, resting-state and task-based fMRI,  
11 as well as short-axis, long-axis, and aortic cine images of cardiac MRI. Seven sleep  
12 conditions were examined, including sleep duration, getting up in the morning,  
13 chronotype, daytime nap, insomnia, snoring, and narcolepsy. Sleep-imaging connections  
14 can be explained in part by shared genetic factors. A variety of analyses were conducted  
15 throughout the paper in order to uncover the overlapping genetic influences, including  
16 polygenic risk scores, identification of shared genetic risk loci and colocalization, genome-  
17 wise and local genetic correlations, Mendelian randomizations, and integrated  
18 predictions.

19

### 20 **Fig. 2 Phenotypic sleep-imaging associations.**

21 **(A)** The  $-\log_{10}(\text{p-value})$  of phenotypic correlations between 7 sleep traits and 6 groups of  
22 imaging, including 101 regional brain volumes, 63 cortical thickness measures, 110 DTI  
23 parameters, 92 resting fMRI traits, 92 task fMRI traits, and 82 heart imaging traits. See  
24 Table S1 for more information of these imaging traits. The red and black dashed lines  
25 indicate the Bonferroni significance level ( $P < 1.33 \times 10^{-5}$ ) and the false discovery rate at  
26 5%, respectively. Each sleep condition is labeled with a different color. **(B)** and **(C)**  
27 Significant correlations between area-level resting functional connectivity traits and  
28 narcolepsy (in B) and sleep duration (in C). We show the correlations that passed the  
29 Bonferroni significance level ( $P < 7.74 \times 10^{-7}$ ). Correlation estimates are indicated by the  
30 color. Visual1, the primary visual network; and Visual2, the secondary visual network.

1

2 **Fig. 3 Jointly significant genomic loci for sleep conditions and imaging traits.**

3 **(A)** In the NHGRI-EBI GWAS catalog (<https://www.ebi.ac.uk/gwas/>, version 2022-07-09),  
4 we found shared genetic influences between sleep and imaging traits in 39 genomic loci  
5 (names are in black color). That is, sleep and imaging GWAS reported significant variants  
6 in these loci and the index variants were in linkage disequilibrium (LD,  $r^2 \geq 0.6$ ). Each  
7 imaging modality is labeled with a different color. We tagged a wide range of reported  
8 sleep traits and grouped them into chronotype (e.g., morningness and morning person),  
9 insomnia (e.g., insomnia and insomnia symptoms), sleep duration (e.g., sleep duration  
10 long sleep and short sleep), and others, such as snoring, hypersomnia, getting up, and  
11 daytime nap. **(B)** We further summarized the results into a table, where the x-axis  
12 represents the 39 genomic regions and y-axis displays the sleep traits. Each imaging  
13 modality is labeled with a different color and the orange color is used when more than  
14 one imaging modalities are observed in the locus.

15

16 **Fig. 4 Selected genetic loci that were associated with both sleep conditions and imaging**  
17 **traits.**

18 **(A)** In 1q25.2, we observed colocalization between chronotype (index variant rs975025)  
19 and the mean axial diffusivity of the splenium of corpus callosum tract (SCC AD, index  
20 variant rs755699529). The posterior probability of Bayesian colocalization analysis for the  
21 shared causal variant hypothesis (PPH4) is 0.976. **(B)** In 19p13.11, we observed  
22 colocalization between chronotype and the mean mode of anisotropy of the external  
23 capsule (EC MO, shared index variant rs9636202, PPH4 = 0.992). In this region,  
24 chronotype was also in LD ( $r^2 \geq 0.6$ ) with reaction time, life satisfaction, smoking,  
25 hypertension, and coronary artery disease. **(C)** In 4q24, we observed colocalization  
26 between insomnia (index variant rs11097861) and functional connectivity among the  
27 triple networks of psychopathology (the default mode, central executive, and salience  
28 networks, index variant rs4417974, PPH4 = 0.952). **(D)** In 14q32.2, we observed  
29 colocalization between snoring and volume of the left thalamus proper (shared index  
30 variant rs2664299, PPH4 = 0.997). We also observed the shared associations (LD  $r^2 \geq 0.6$ )

1 with self-reported math ability, cognitive performance, smoking initiation, and  
2 educational attainment.

3

4 **Fig. 5 Genetic correlations between sleep and imaging traits.**

5 **(A)** We illustrated the pattern of significant genome-wide genetic correlation estimates  
6 (at the 5% false discovery rate level by LDSC,  $P < 6.18 \times 10^{-4}$ ) between various groups of  
7 imaging traits (left upper panel) and sleep conditions (left lower panel). We listed the  
8 number of significant pairs for each imaging group and sleep condition on the right side.

9 **(B)** We illustrated pattern of significant local genetic correlation estimates (at the 5% false  
10 discovery rate level,  $P < 1.87 \times 10^{-4}$ ) between various groups of imaging traits (left upper  
11 panel) and sleep conditions (left lower panel) by LAVA. We listed the number of significant  
12 pairs for each imaging group and sleep condition on the right side.

13

14 **Fig. 6 Integrative prediction analysis for sleep conditions and mental traits.**

15 **(A)** Predicting 7 sleep conditions using multimodal brain imaging traits, including DTI  
16 parameters, region brain volumes, ICA-based resting fMRI traits (resting ICA),  
17 parcellation-based network and area-level resting and task fMRI traits (resting g360  
18 network, resting g360 area, task g360 network, and task g360 area), and all modalities  
19 (joint of all brain MRI traits). **(B)** Predicting 7 sleep conditions using multiple data types.  
20 PRS, sleep polygenic risk scores of genetic variants, Brain imaging, multimodal brain  
21 imaging traits. **(C)** The accuracy of neuroticism prediction analysis using different types of  
22 data. PRS, neuroticism polygenic risk scores of genetic variants, Brain imaging, multimodal  
23 brain imaging traits. **(D)** The accuracy of different data types in neuroticism prediction  
24 analysis before (marginal) and after controlling sleep traits (conditional on sleep).



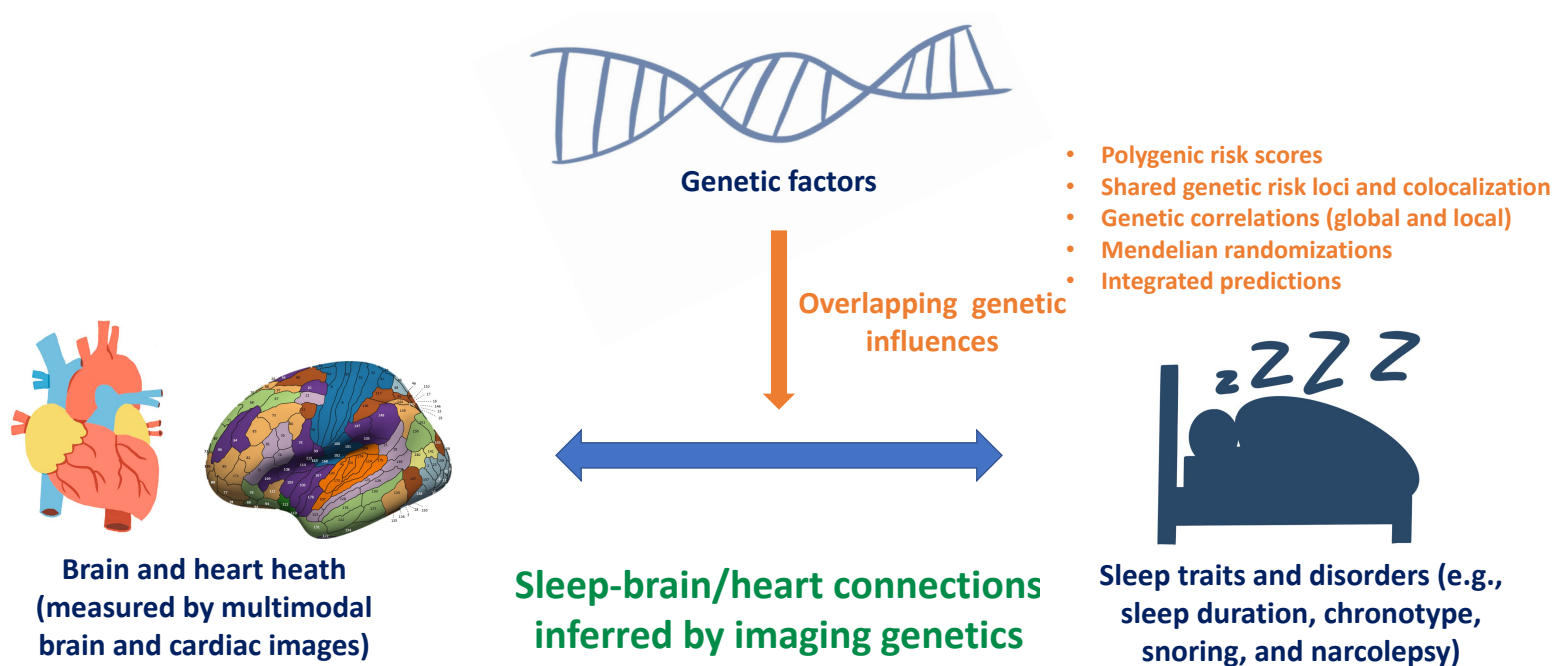

Figure 1

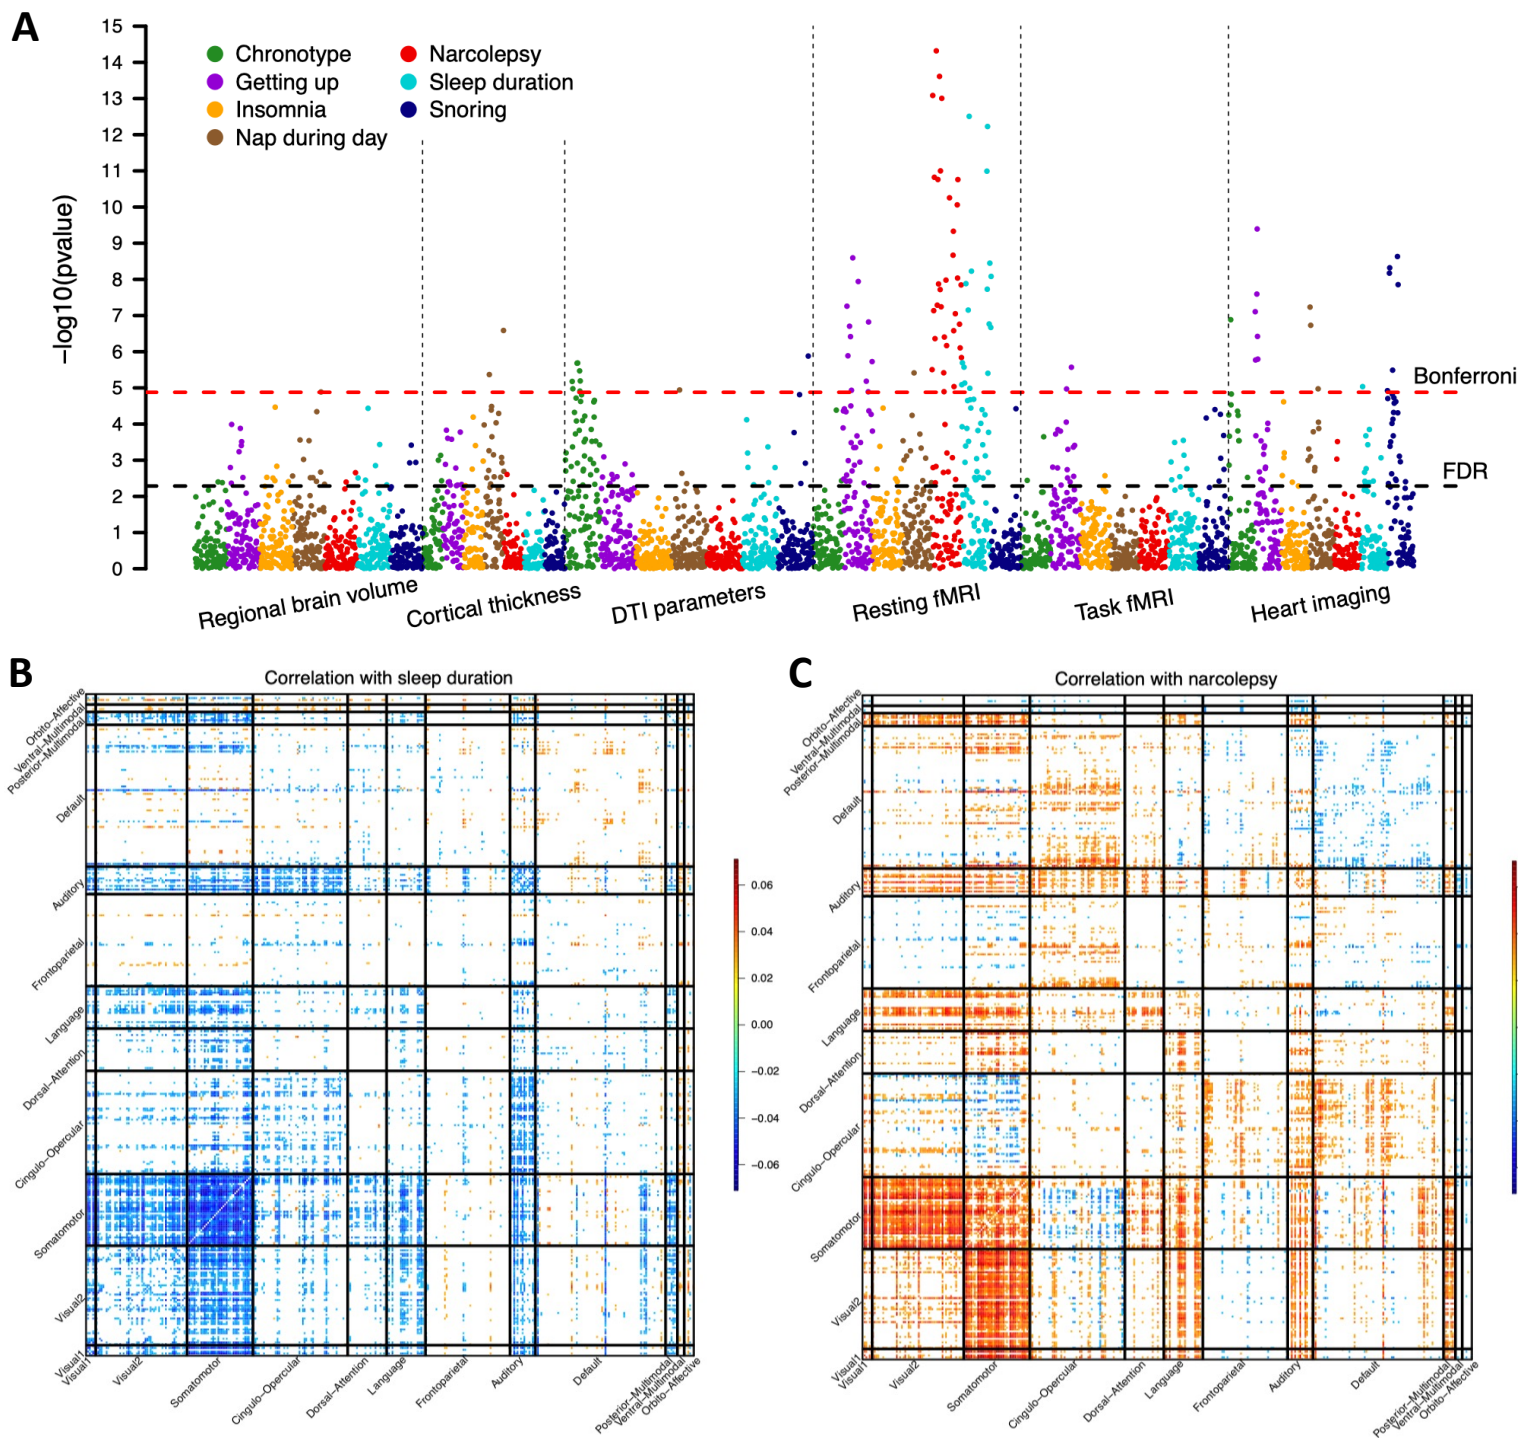

Figure 2

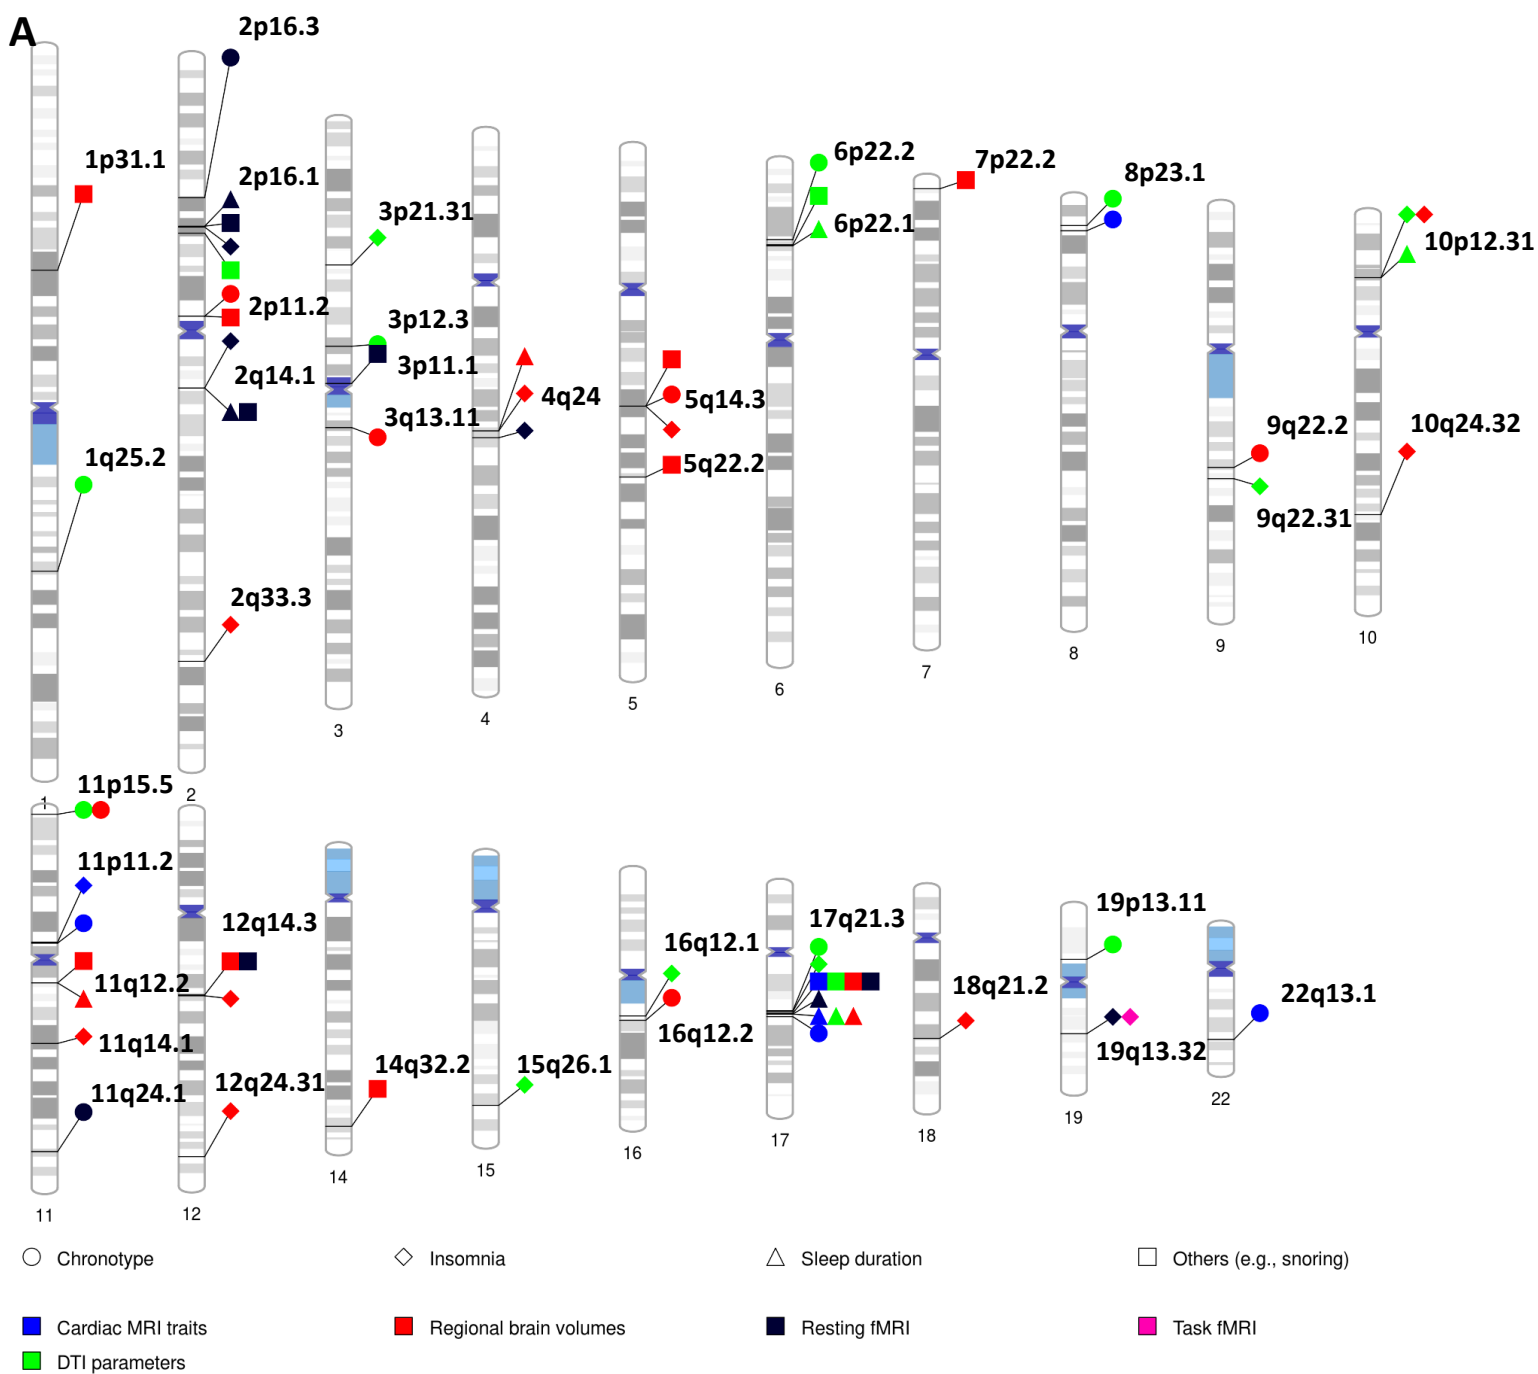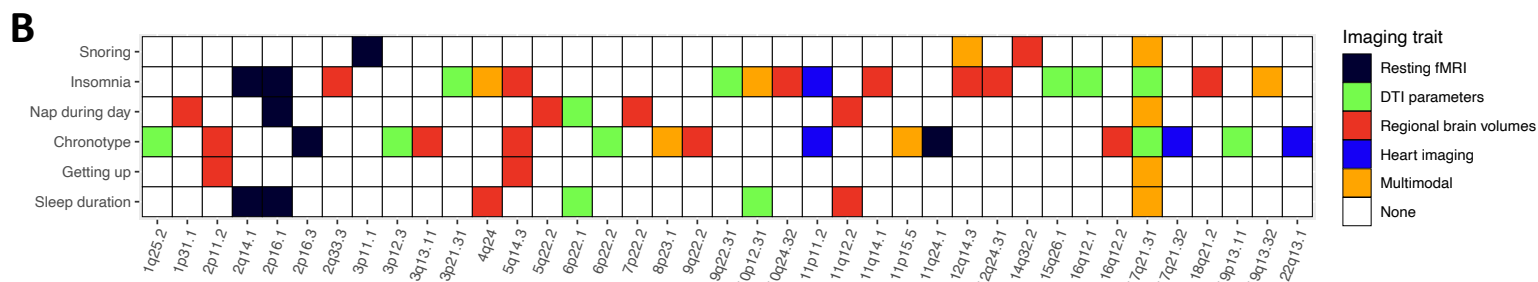

Figure 3

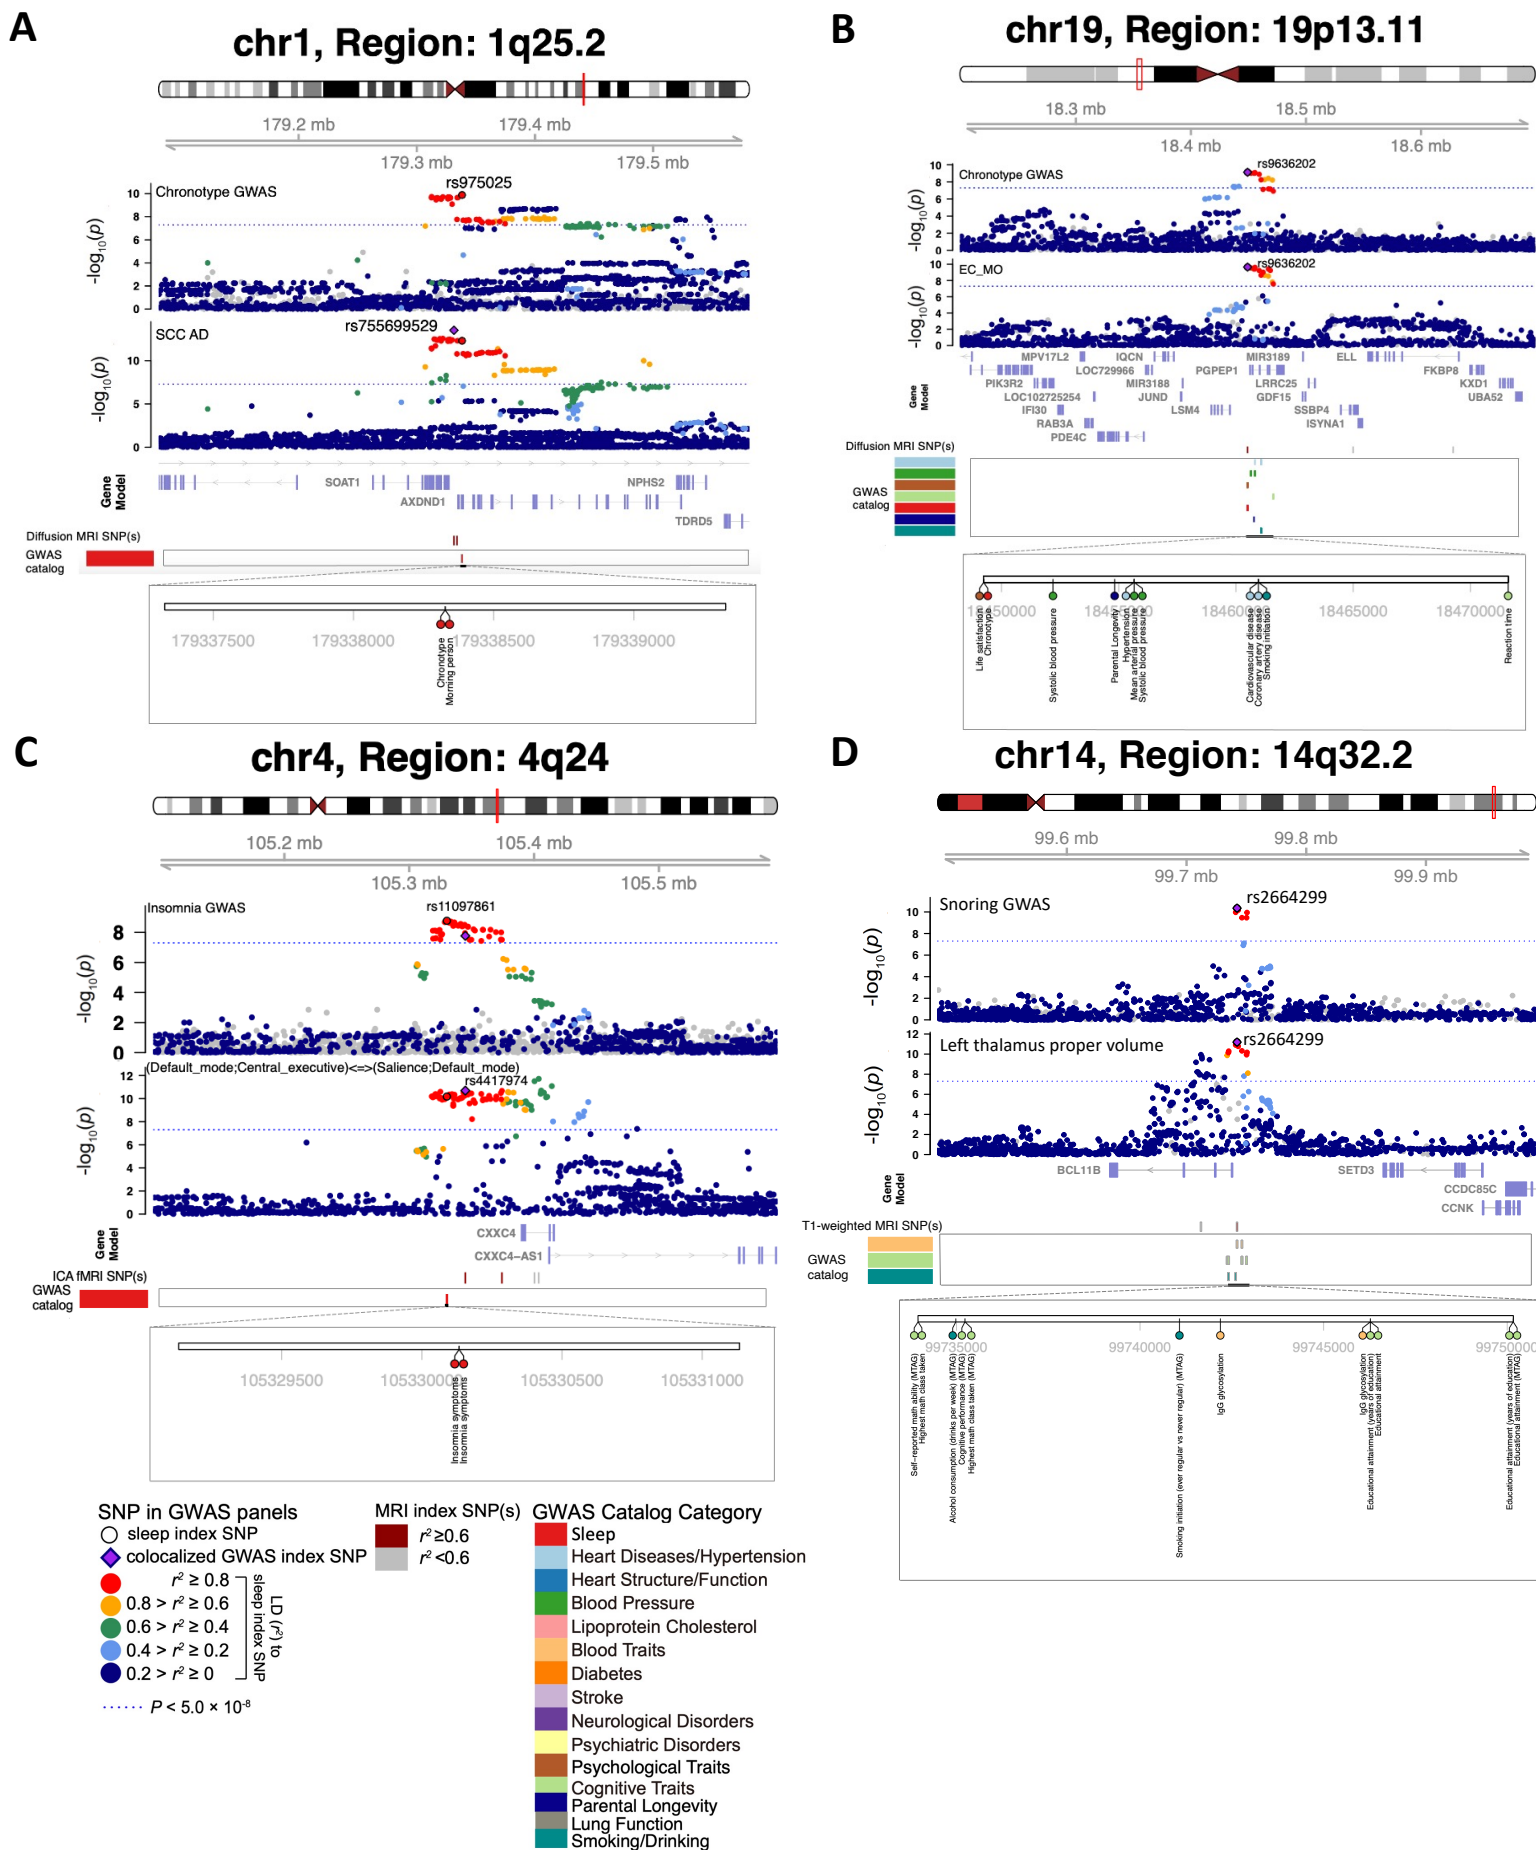

Figure 4

**A**

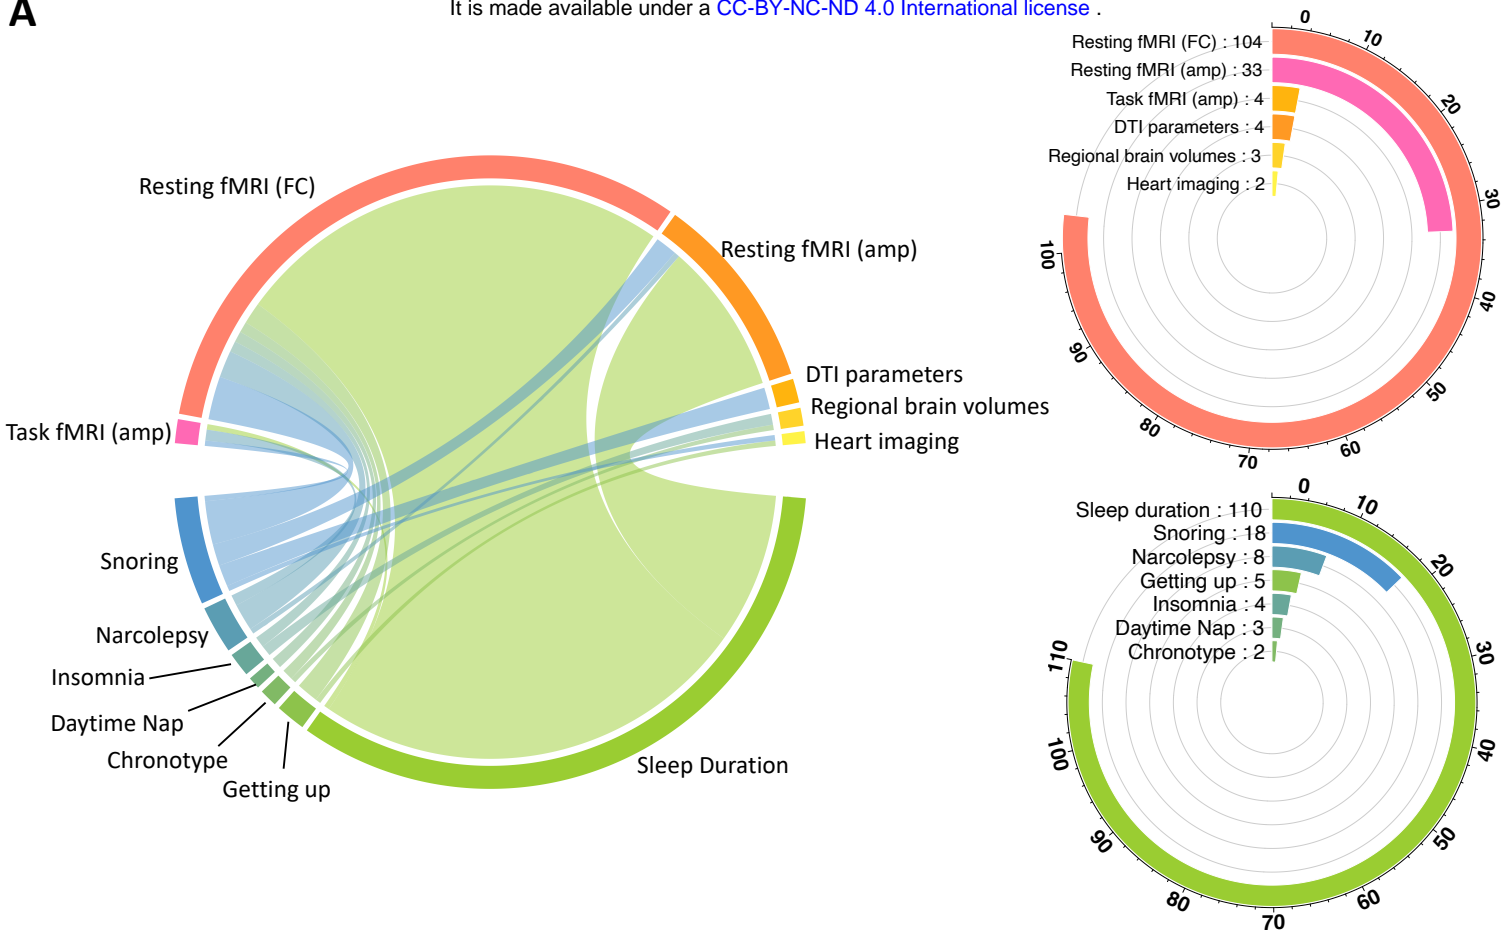

**B**

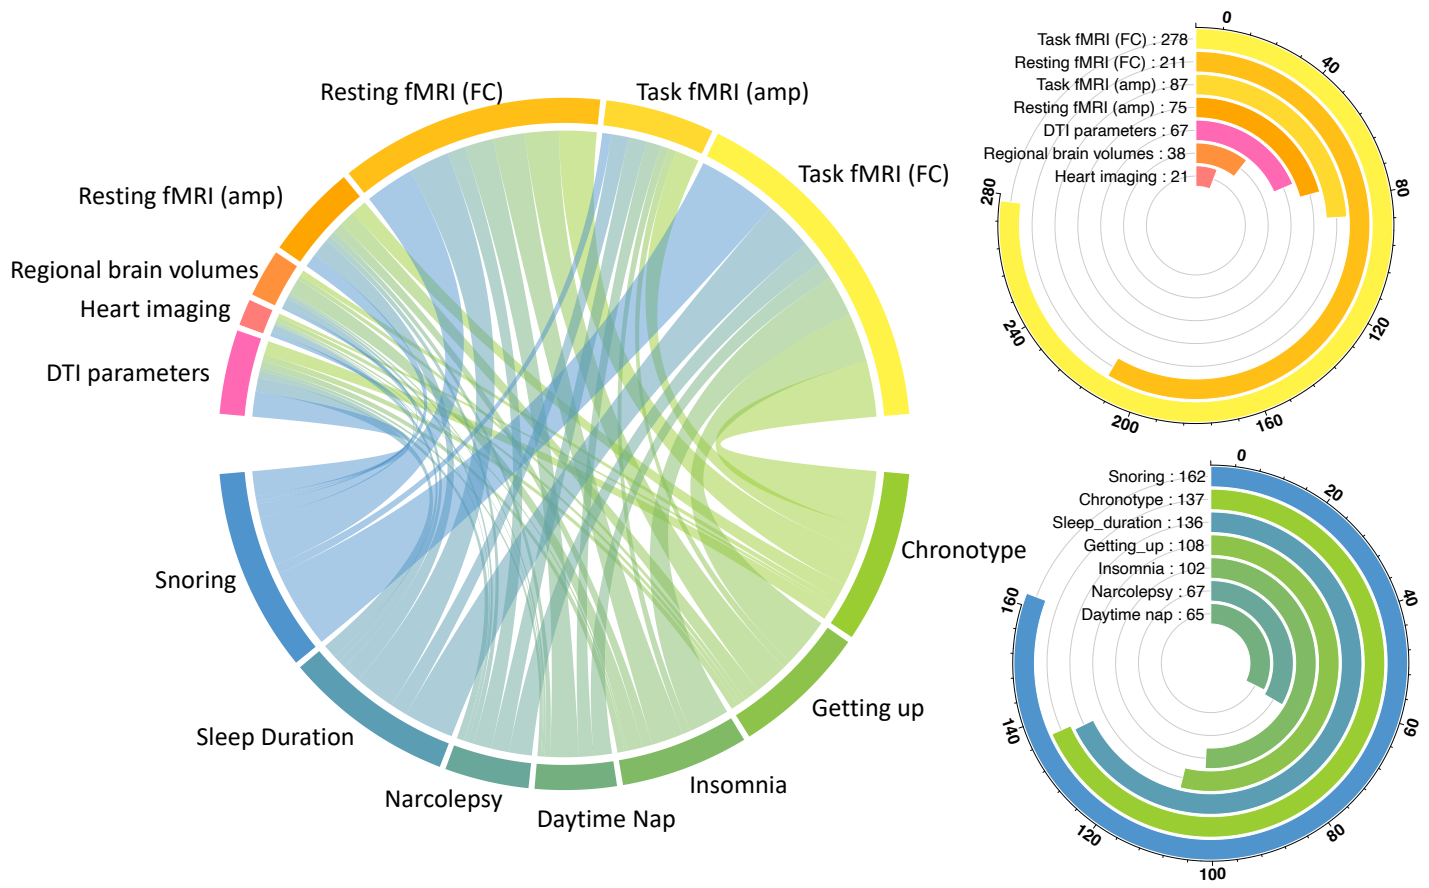

Figure 5

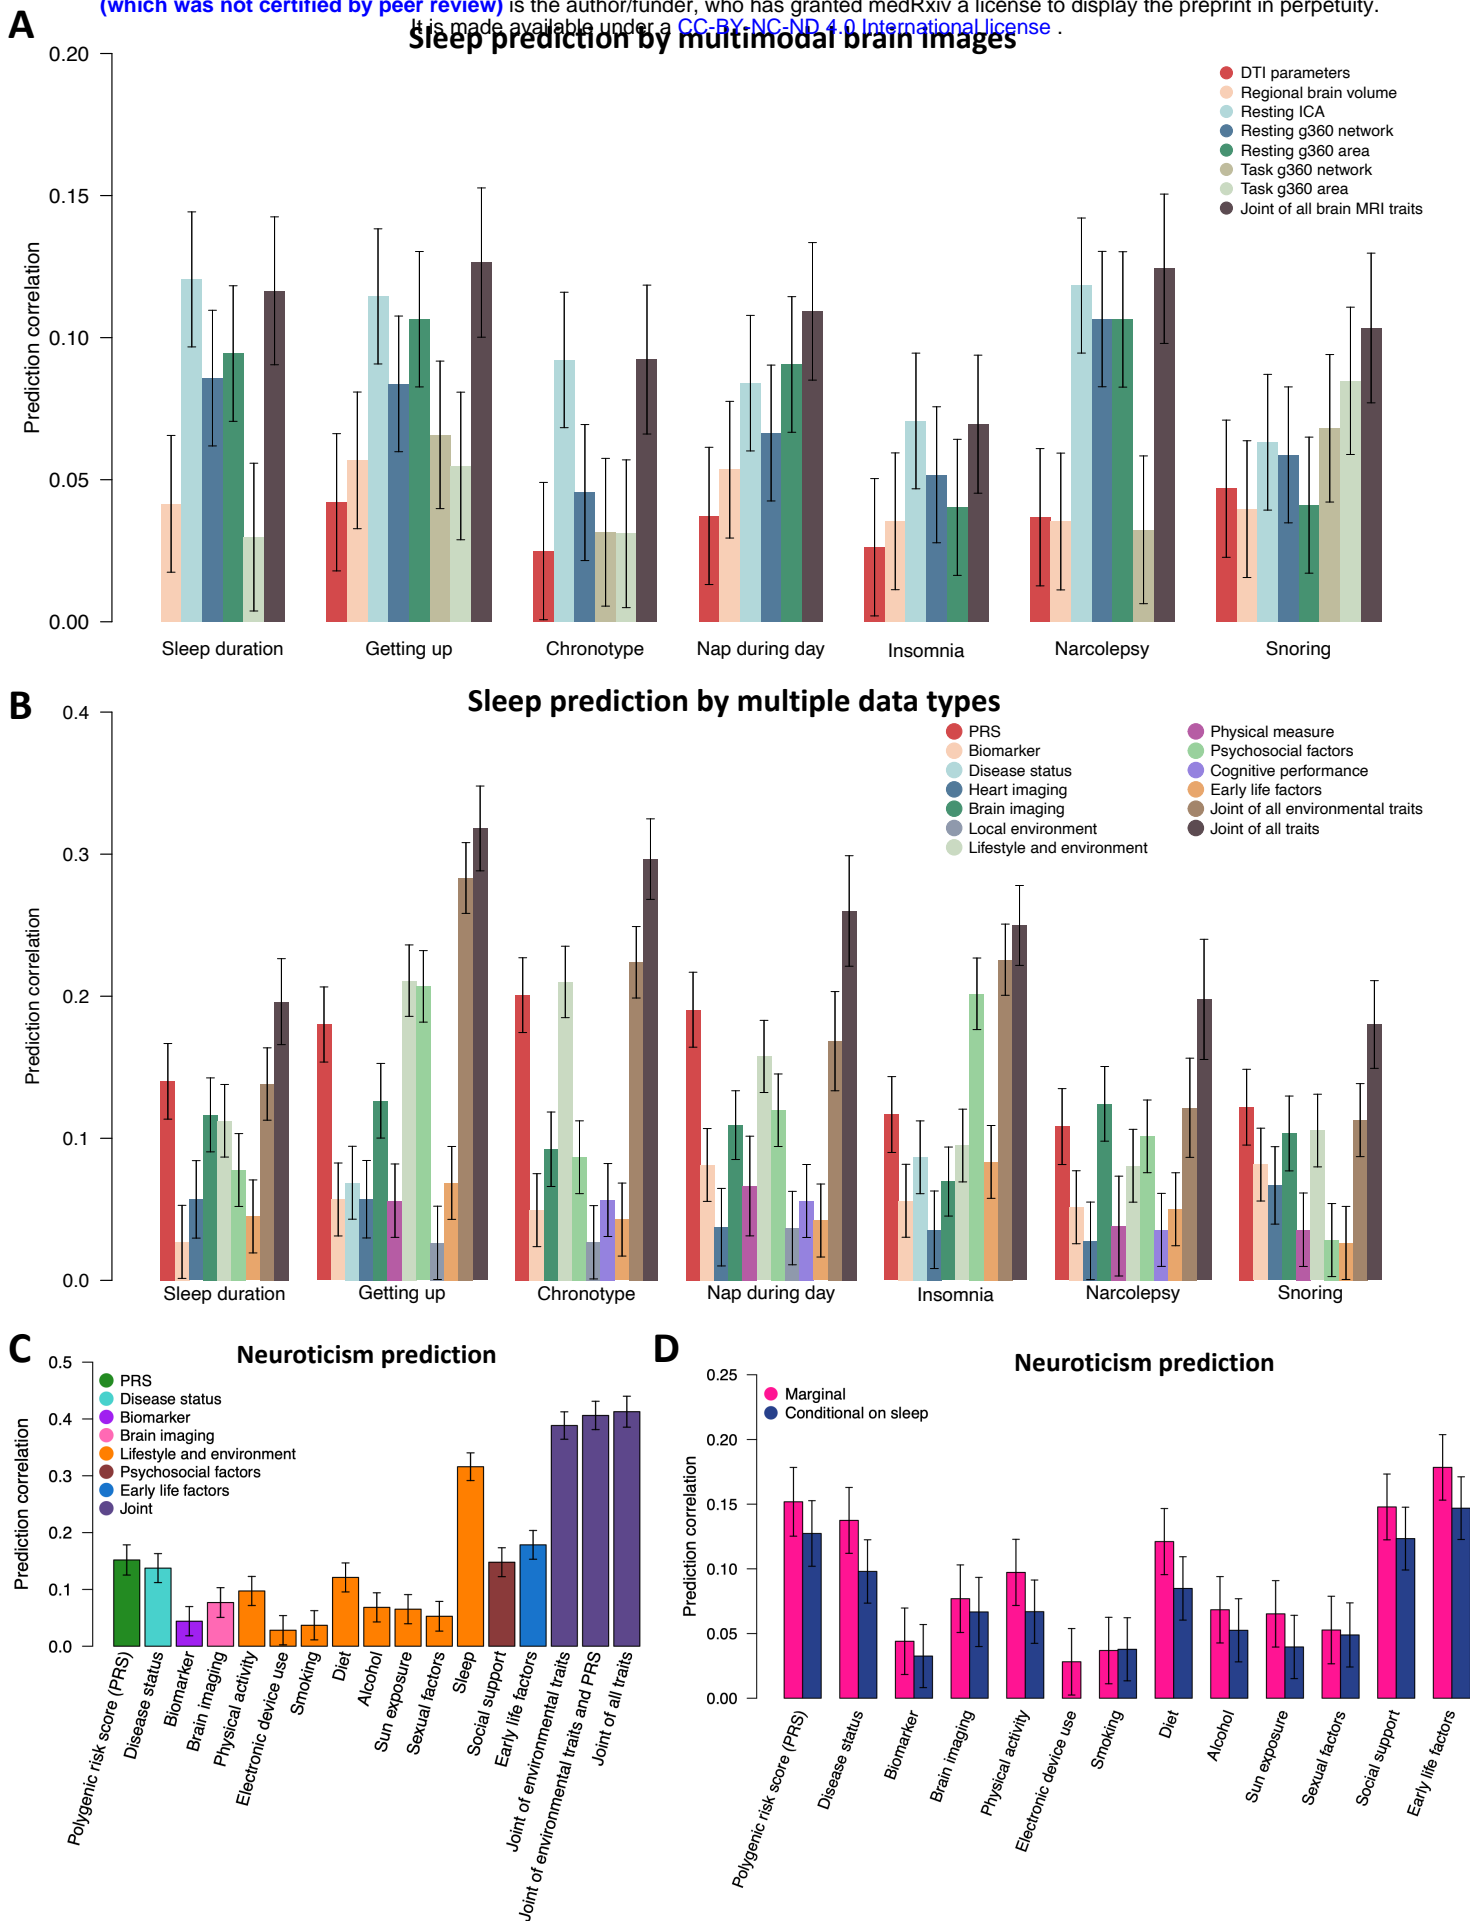

Figure 6
